# Supplementary material for: Design and synthesis of magnetic Fe3O4@NFC-ImSalophCu nanocatalyst based on cellulose nanofibers as a new and highly efficient, reusable, stable and green catalyst for the synthesis of 1,2,3-triazoles
Source: PubMed Central journal article supplement — RSC Adv. 2020 Sep 4;10(54):32927–37. doi: 10.1039/d0ra06251k (PMC9056646; doi:10.1039/d0ra06251k), 2020-09-04

## Supplementary Information

### Design and synthesis of magnetic Fe<sub>3</sub>O<sub>4</sub>@NFC-ImSalophCu nano catalyst based on cellulose nanofibers as a new and highly efficient, reusable, stable and green catalyst for synthesis of 1,2,3-triazoles

Pouya Ghamari kargar, <sup>a</sup> Ghodsieh Bagherzade\*<sup>a</sup> and Hossein Eshghi <sup>b</sup>

#### 5-(chloromethyl)-2-hydroxybenzaldehyde (4)

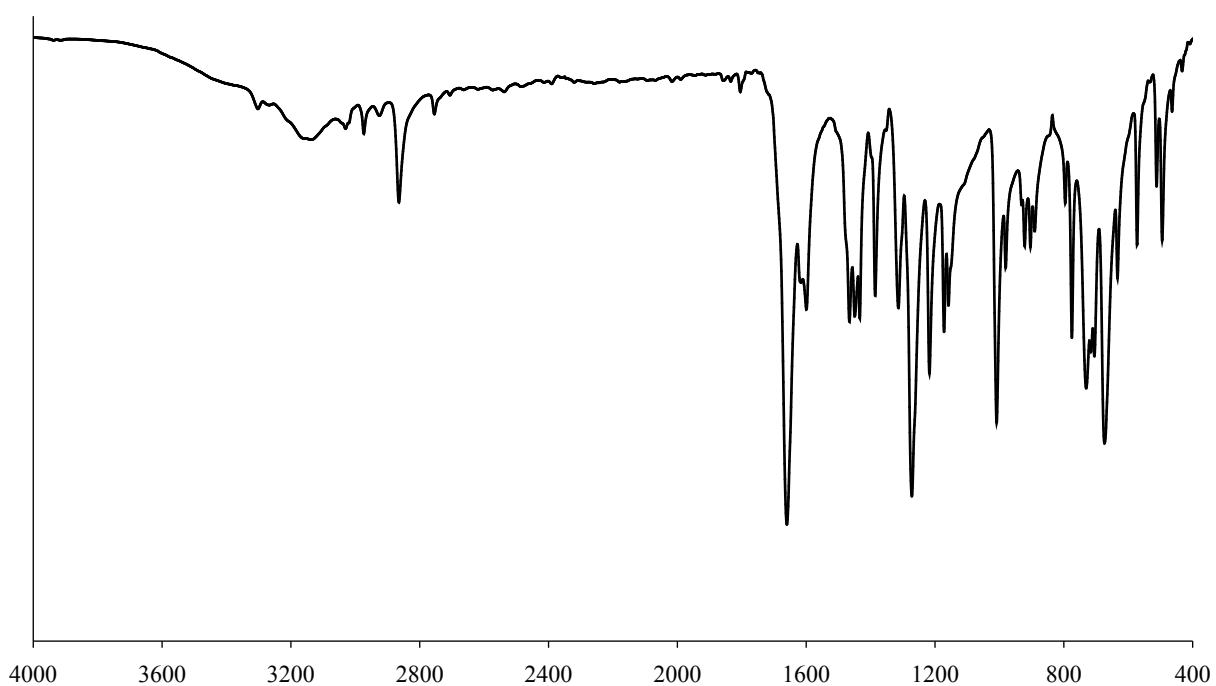

---

a. Department of Chemistry, Faculty of Sciences, University of Birjand, Birjand, 97175-615, Iran. E-mail: gbagherzade@gmail.com, [bagherzade@birjand.ac.ir](mailto:bagherzade@birjand.ac.ir); ax: +98 56 32345192; Tel: +98 56 32345192 Address here.  
b. Department of Chemistry, Faculty of Science, Ferdowsi University of Mashhad, Mashhad, Iran.

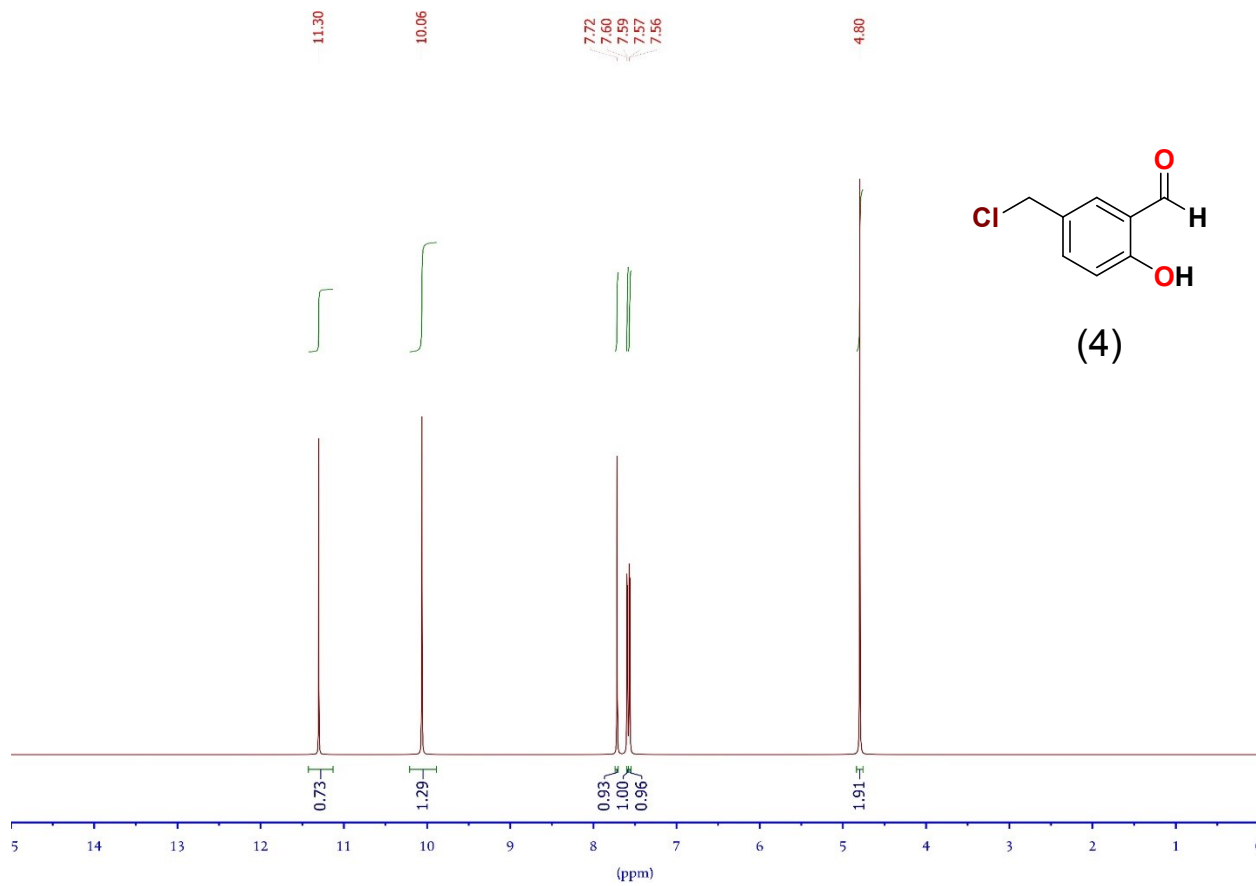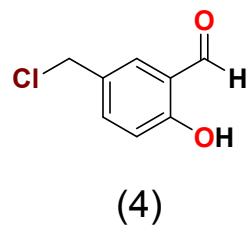

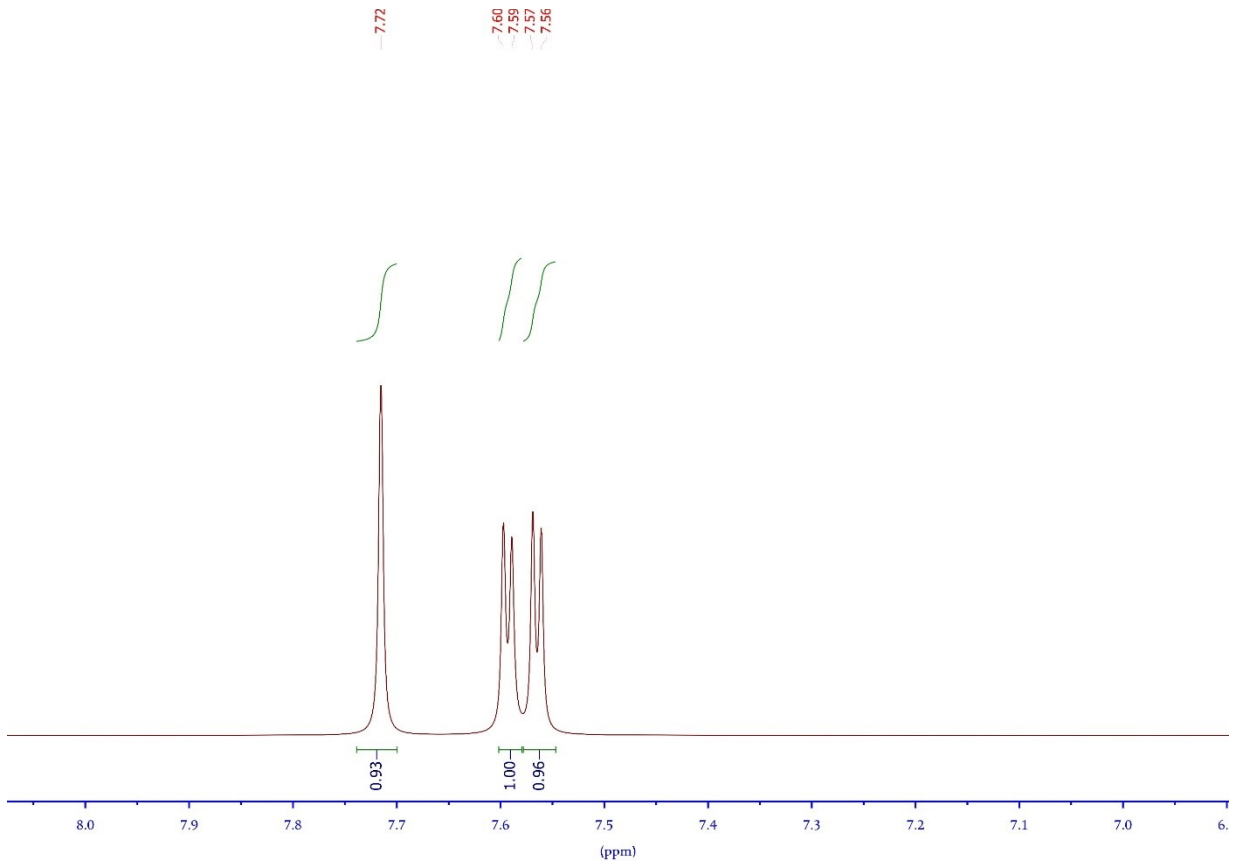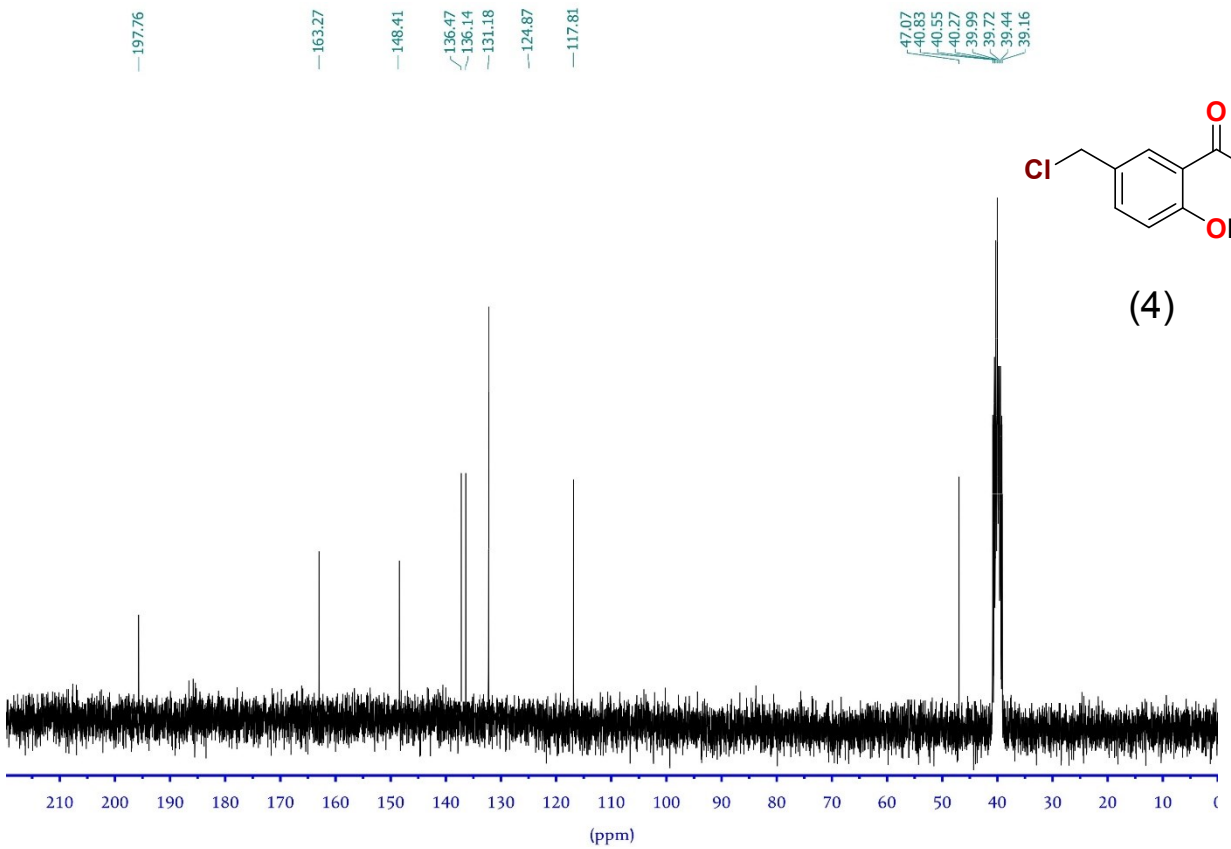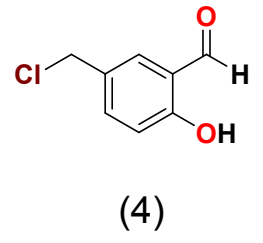

1-phenyl-2-(4-phenyl-1H-1,2,3-triazol-1-yl) ethanone (11a)

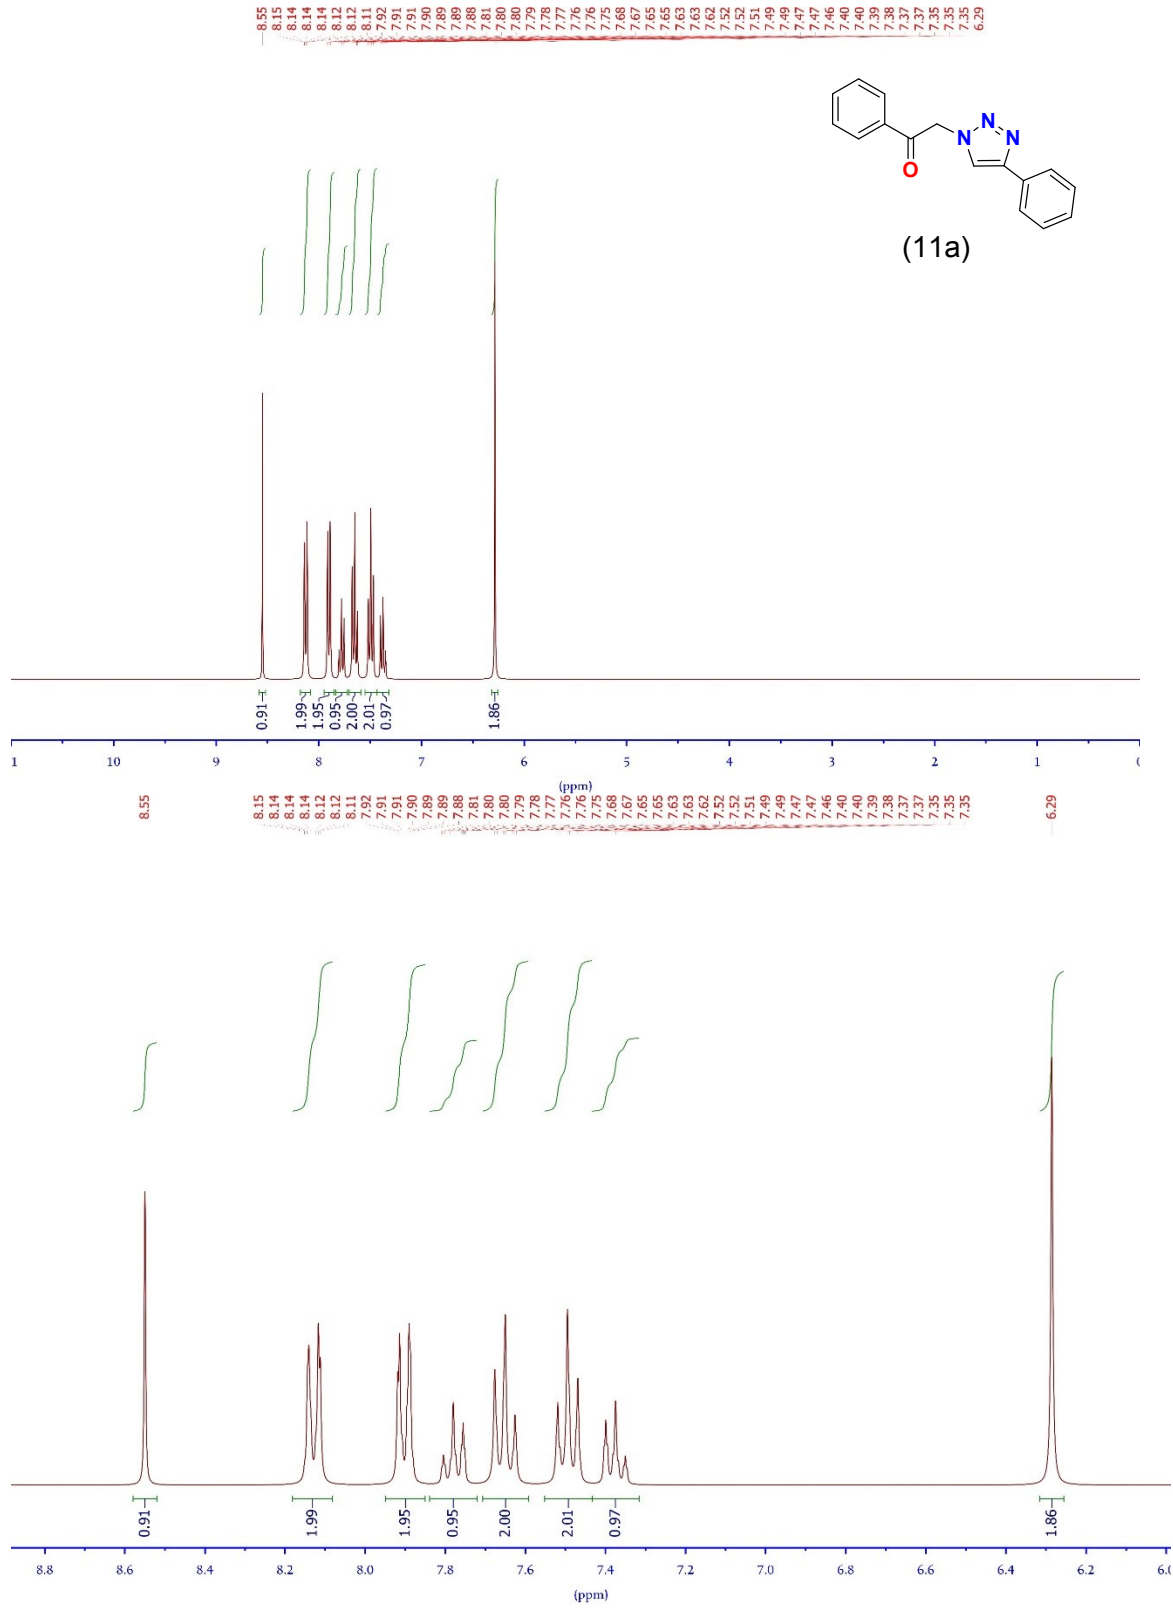

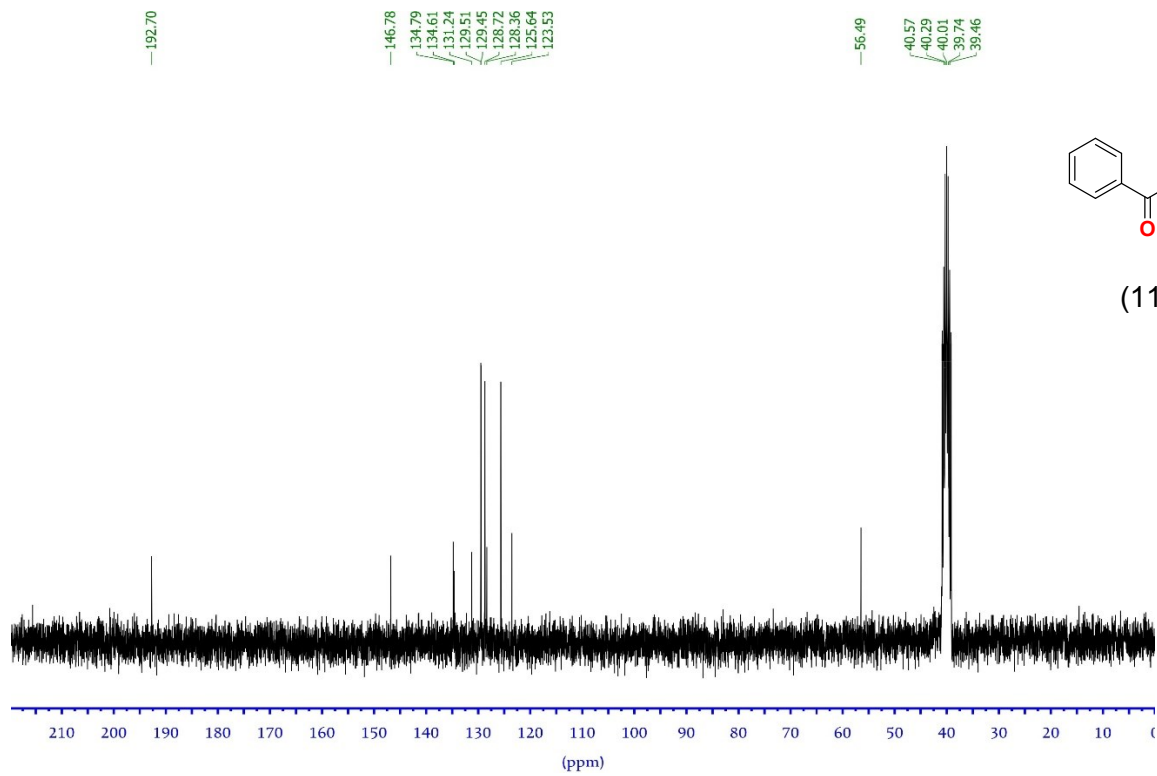

1-(4-nitro phenyl)-2-(4-phenyl-1H-1,2,3-triazol-1-yl) ethanone (11b)

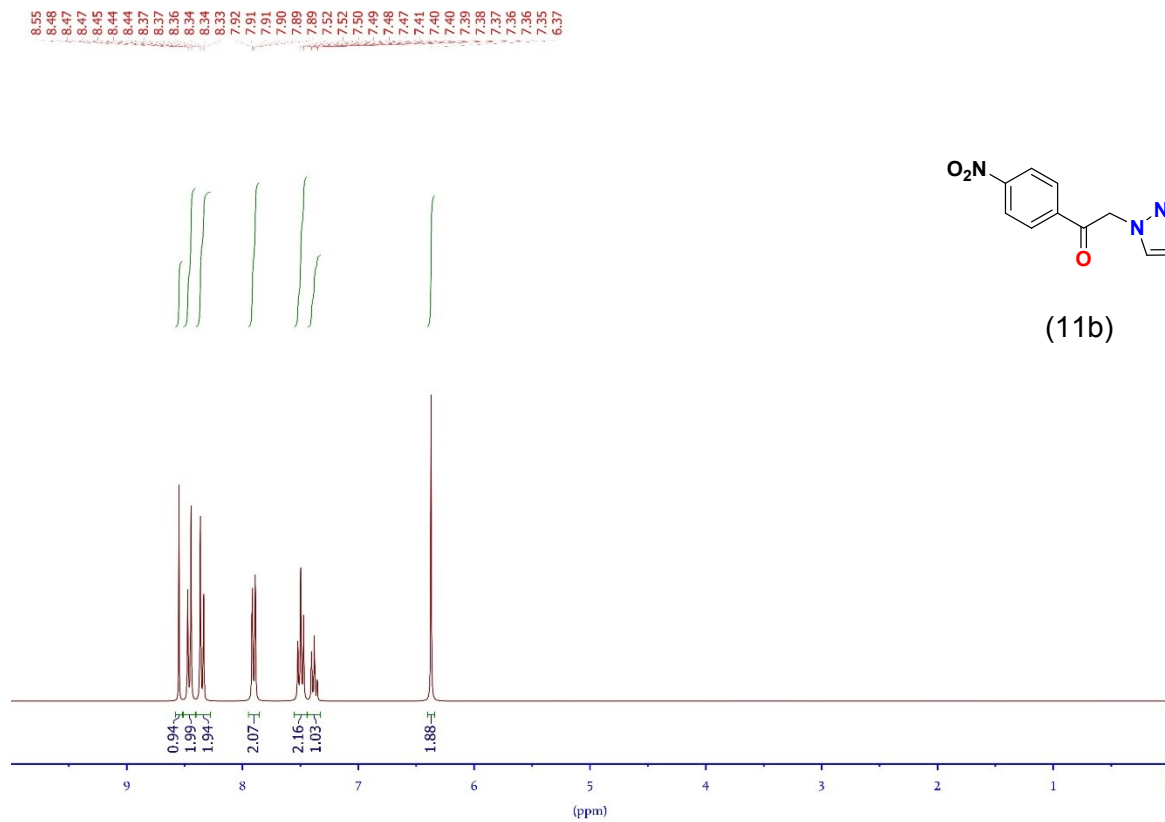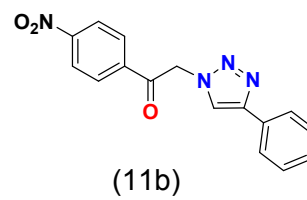

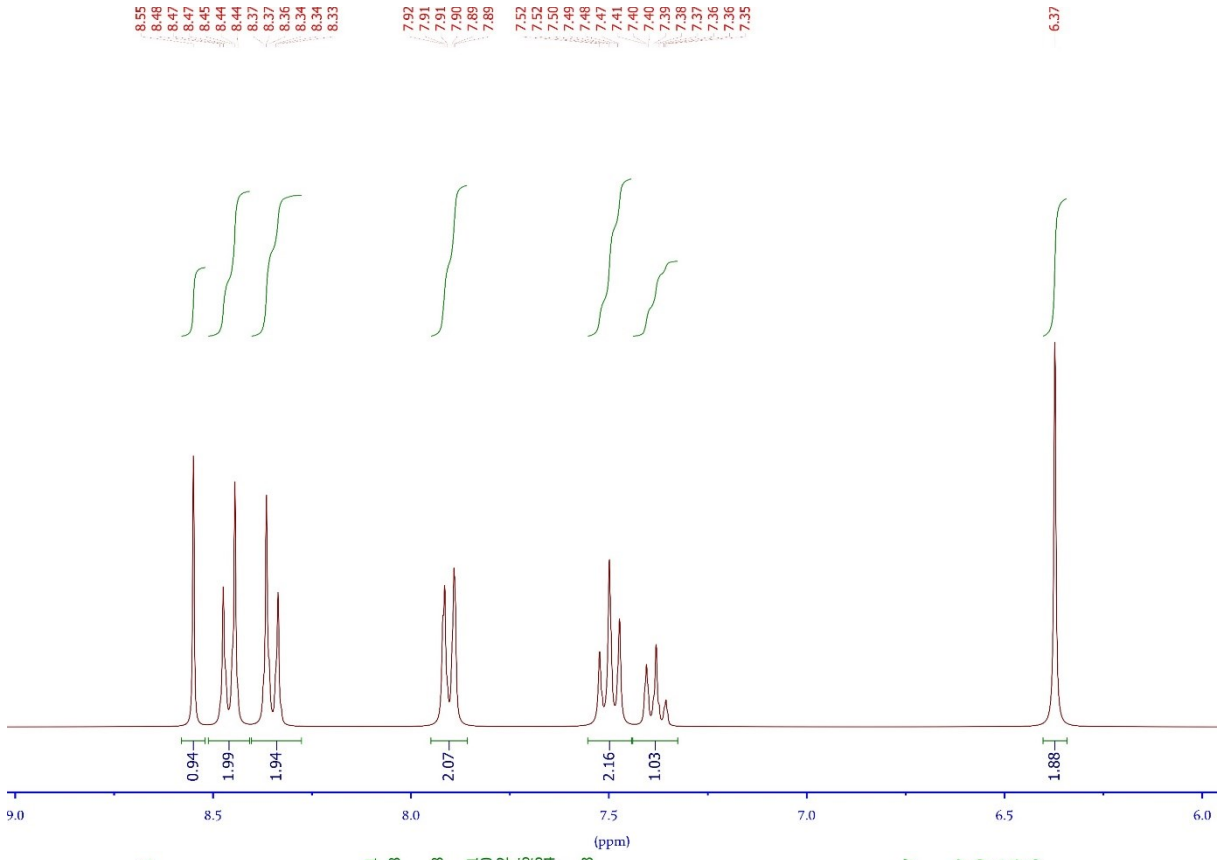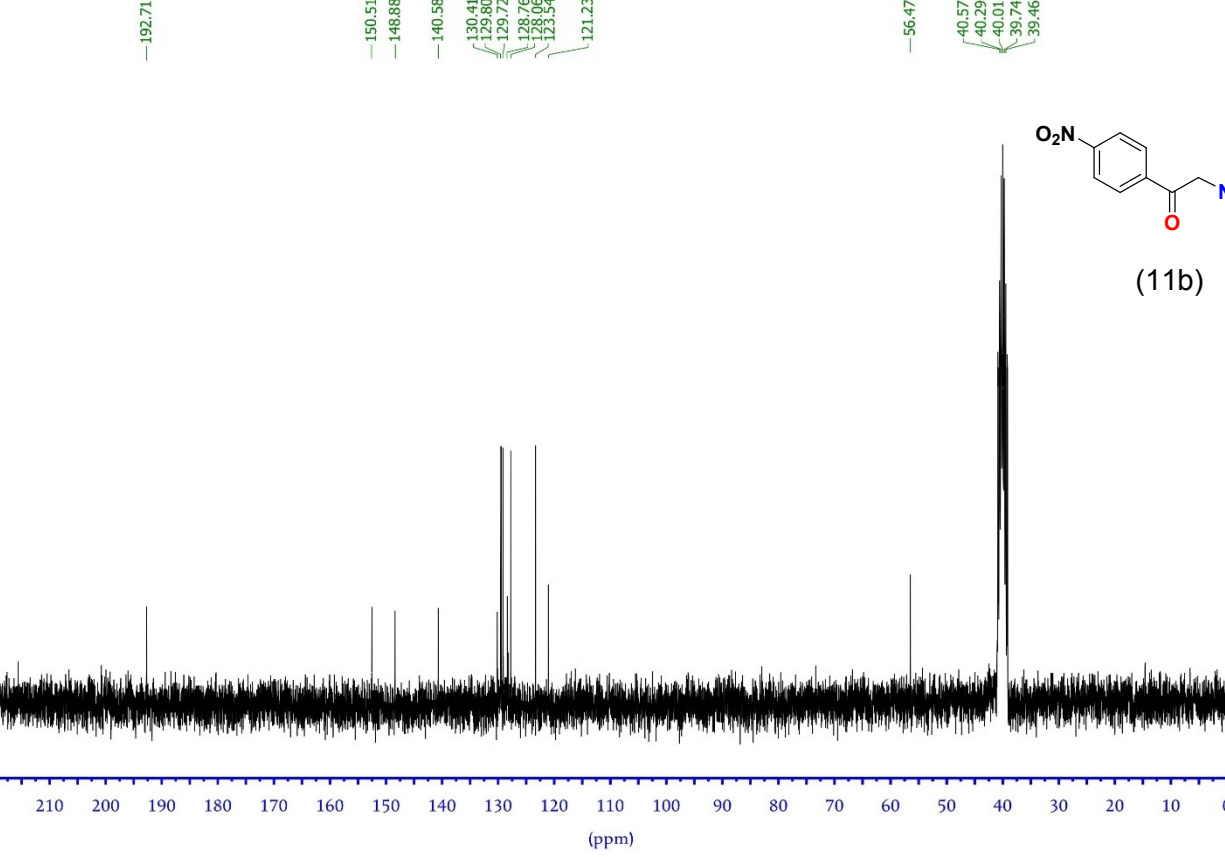

1-(4- bromophenyl)-2- (4-phenyl-1H-1,2,3-triazol-1-yl) ethanone (11c)

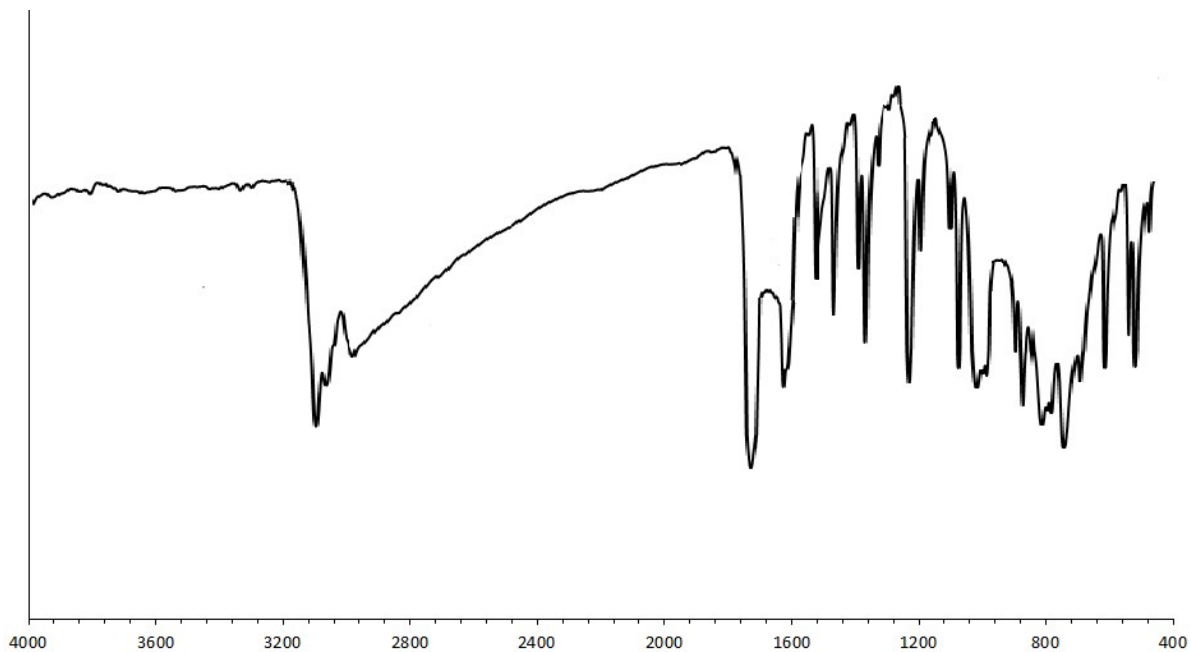

8.54  
8.07  
8.06  
8.06  
8.04  
8.04  
8.03  
7.91  
7.91  
7.90  
7.89  
7.89  
7.88  
7.88  
7.87  
7.86  
7.85  
7.85  
7.52  
7.52  
7.51  
7.49  
7.49  
7.47  
7.47  
7.40  
7.40  
7.39  
7.38  
7.37  
7.37  
7.35  
7.35  
6.27

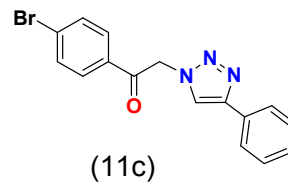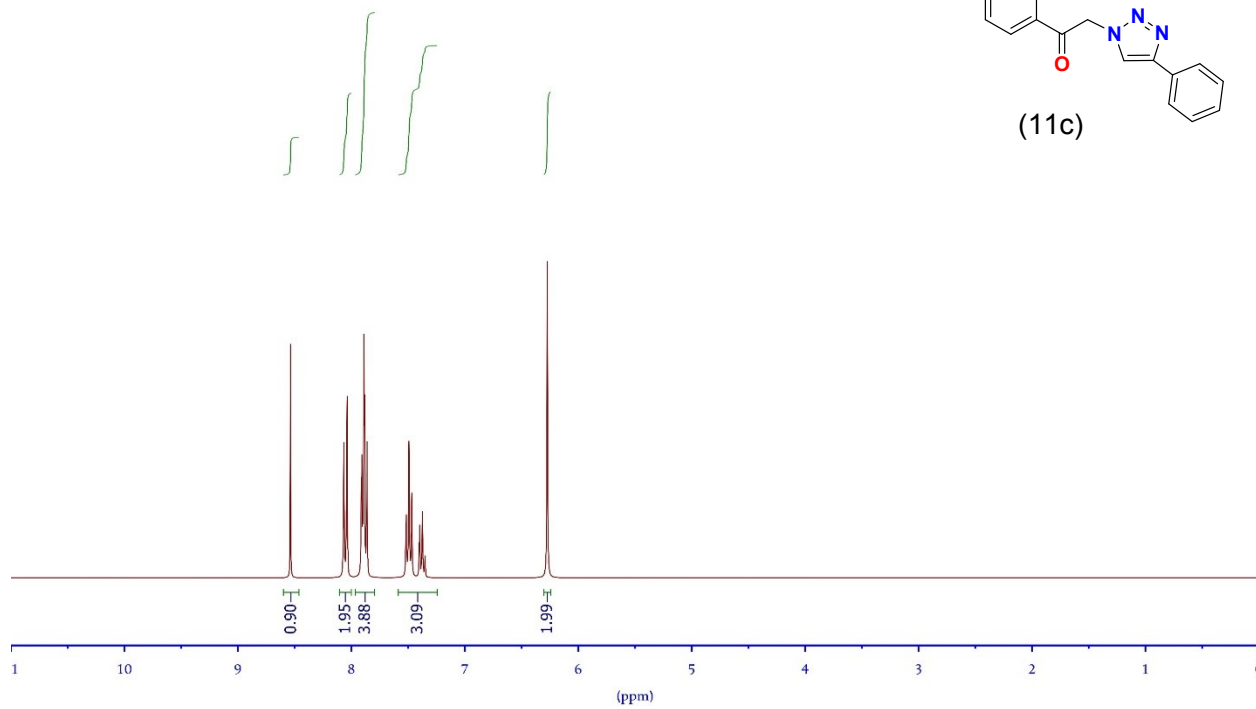



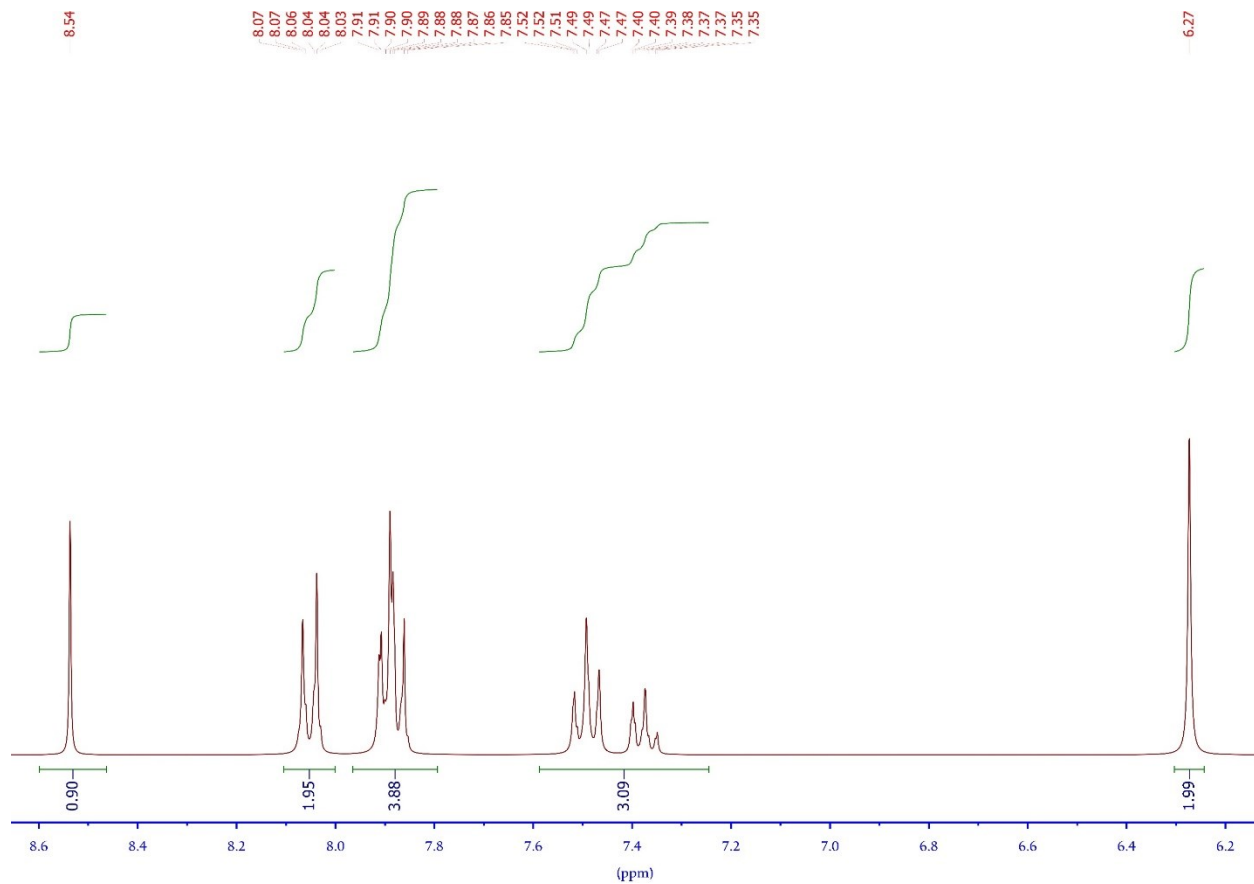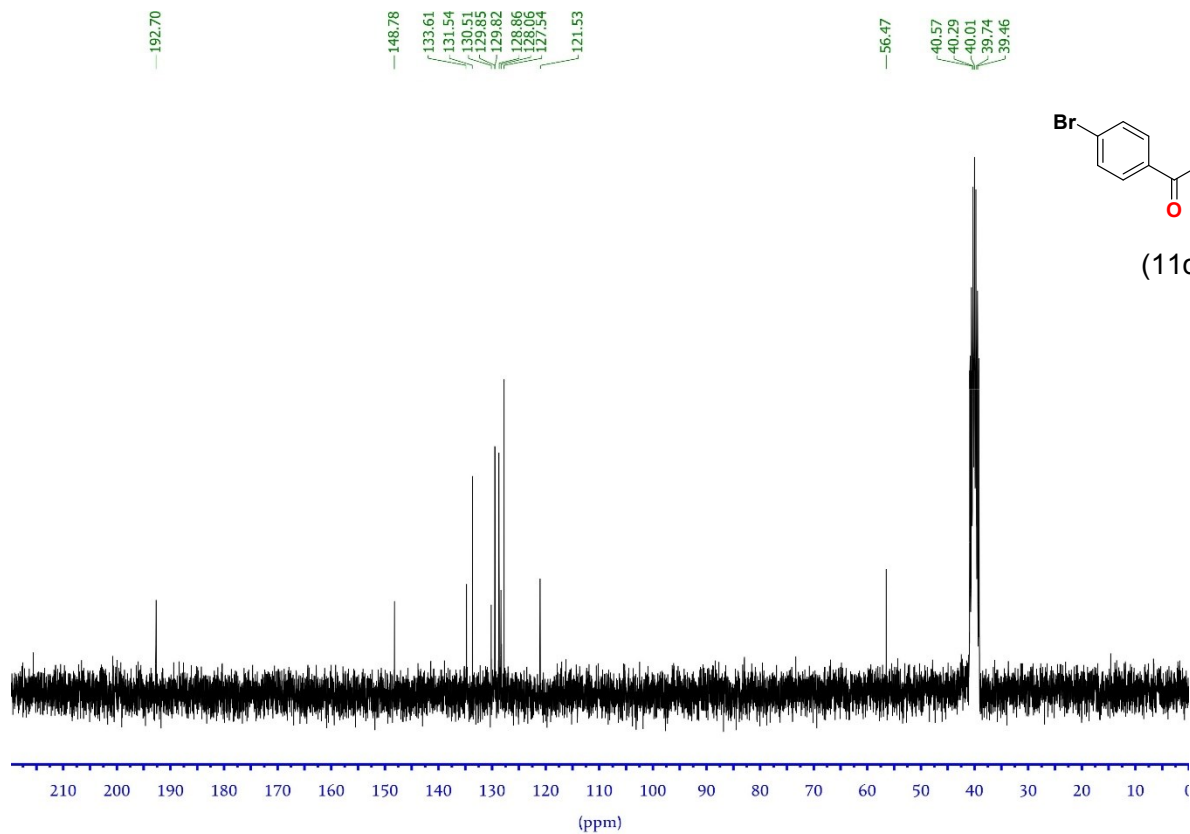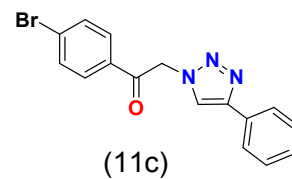

2-(4-(hydroxymethyl)-1H-1,2,3-triazol-1-yl)-1-phenylethanone (11d)

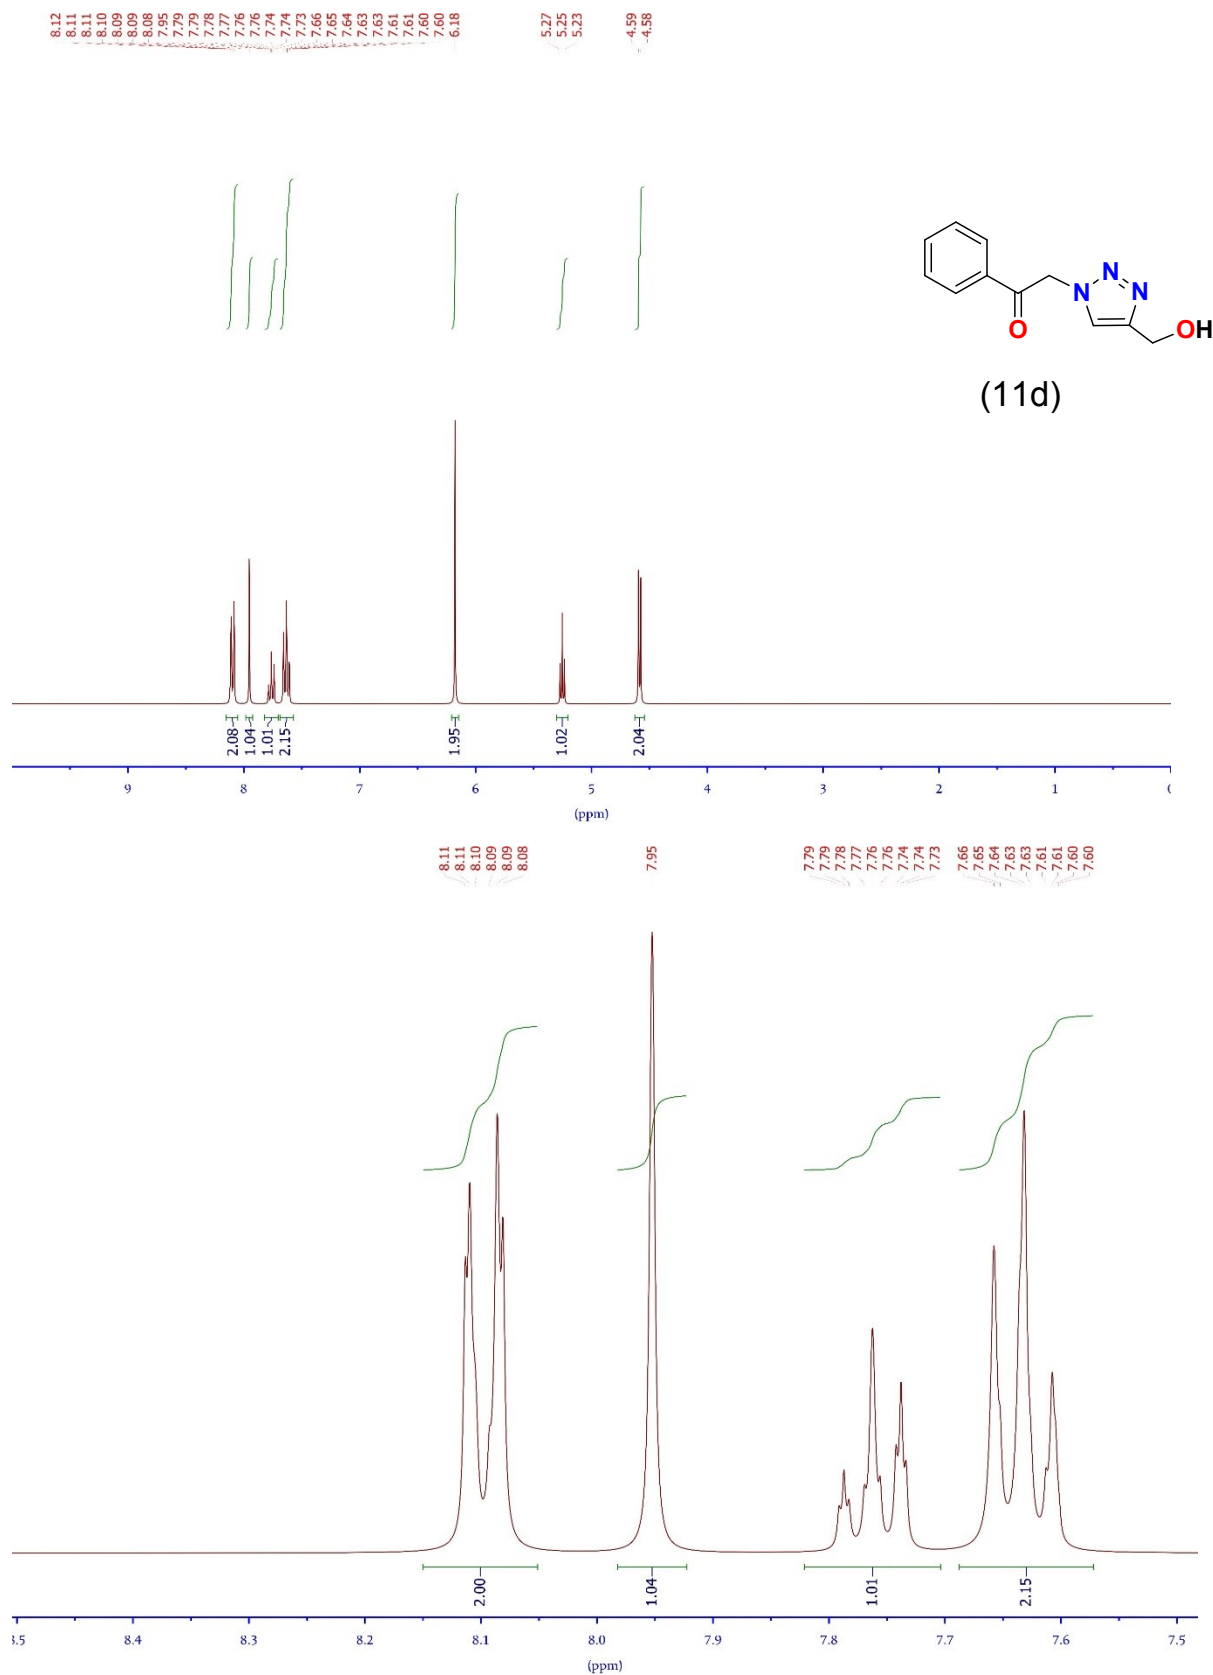

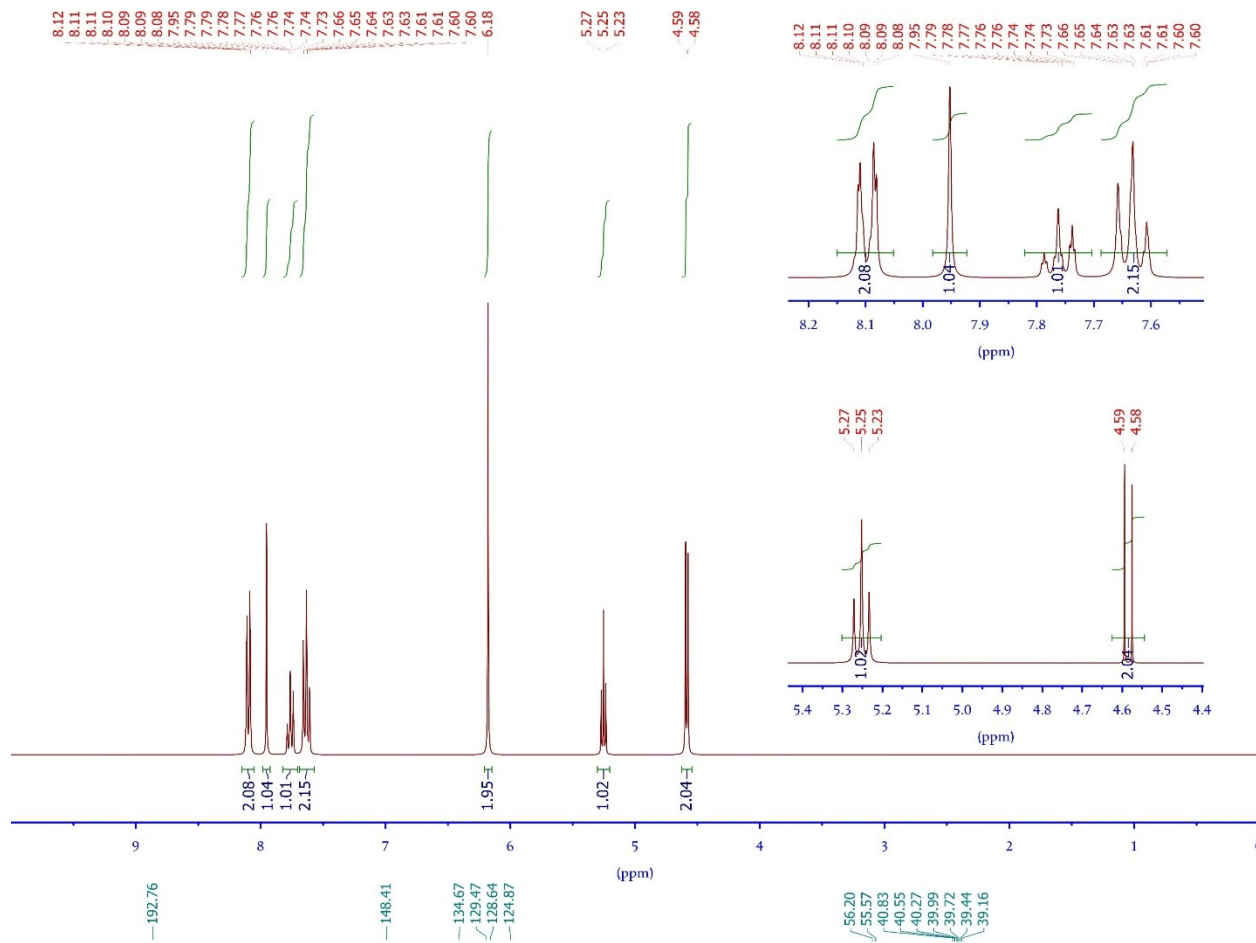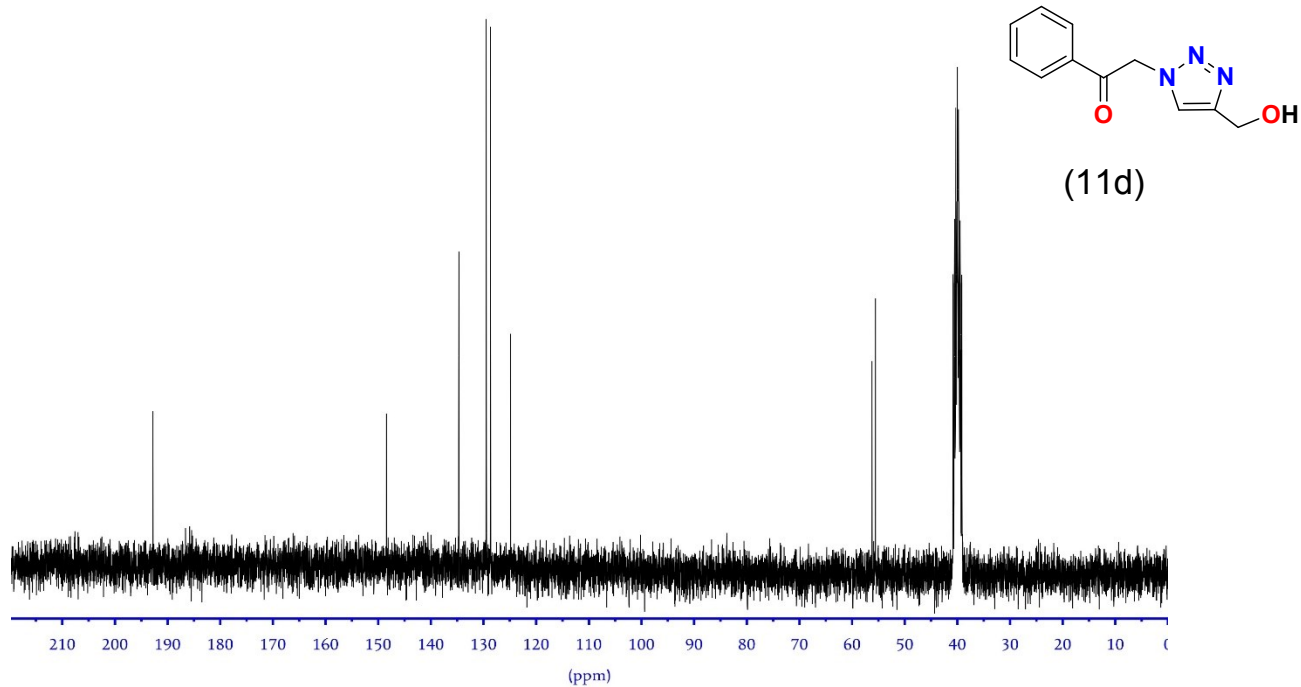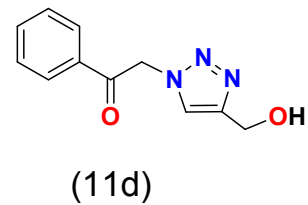

2- (4- (hydroxymethyl)- 1H- 1,2,3- triazol- 1- yl)- 1- (4-nitrophenyl) ethanone (11e)

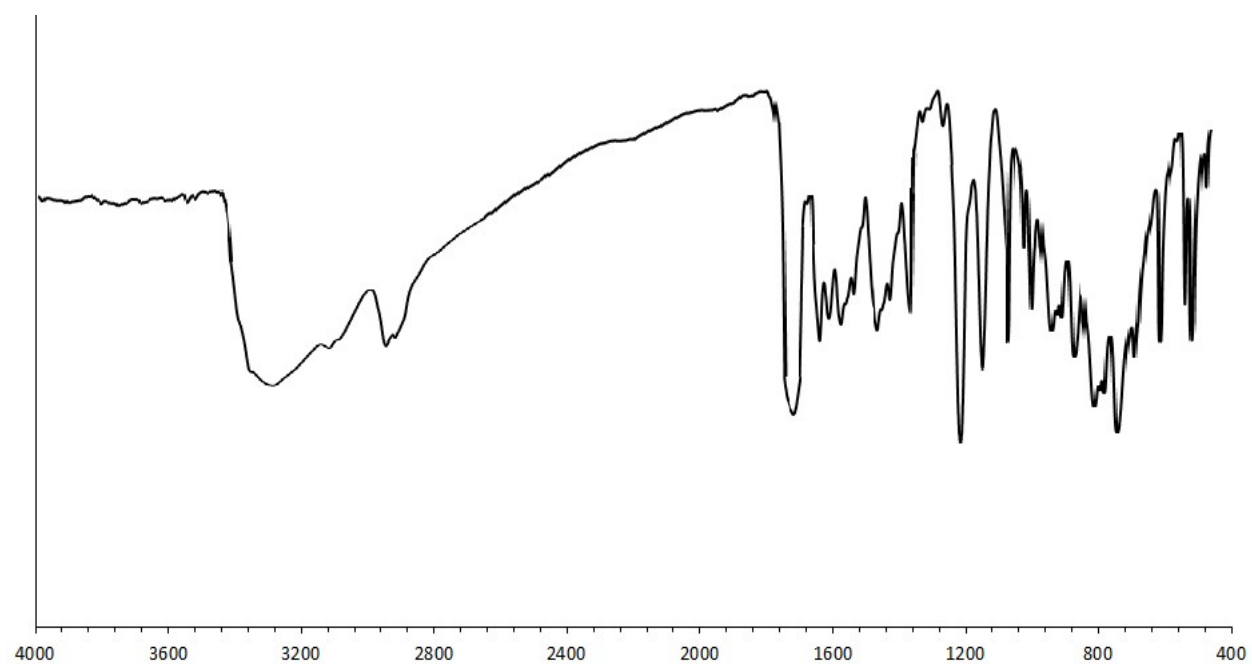

8.40  
8.39  
8.37  
8.35  
7.80  
6.13  
4.65  
4.22

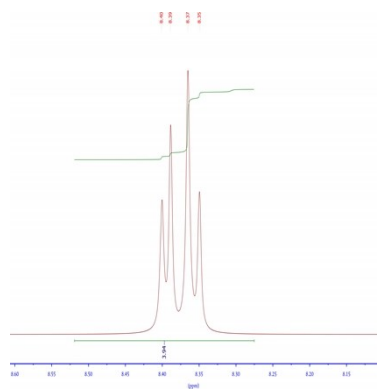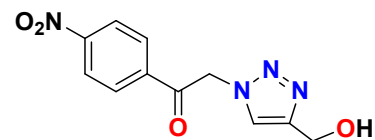

(11e)

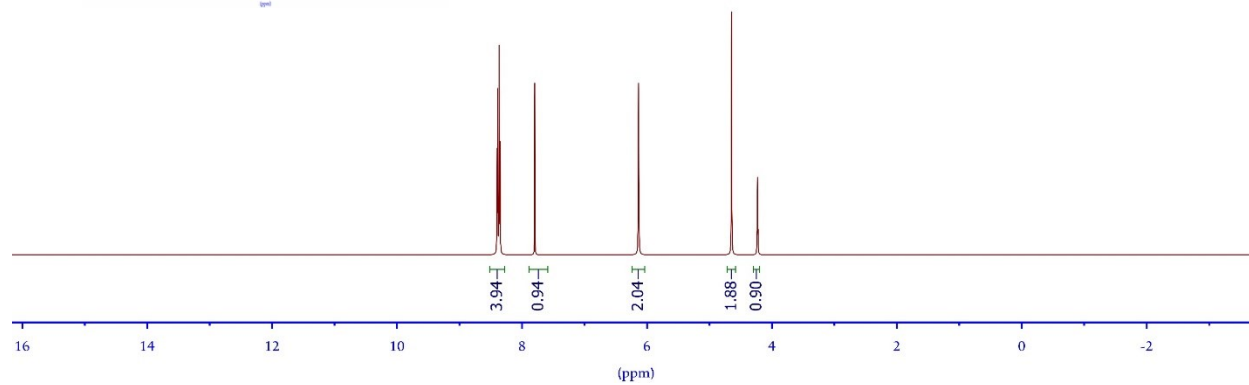

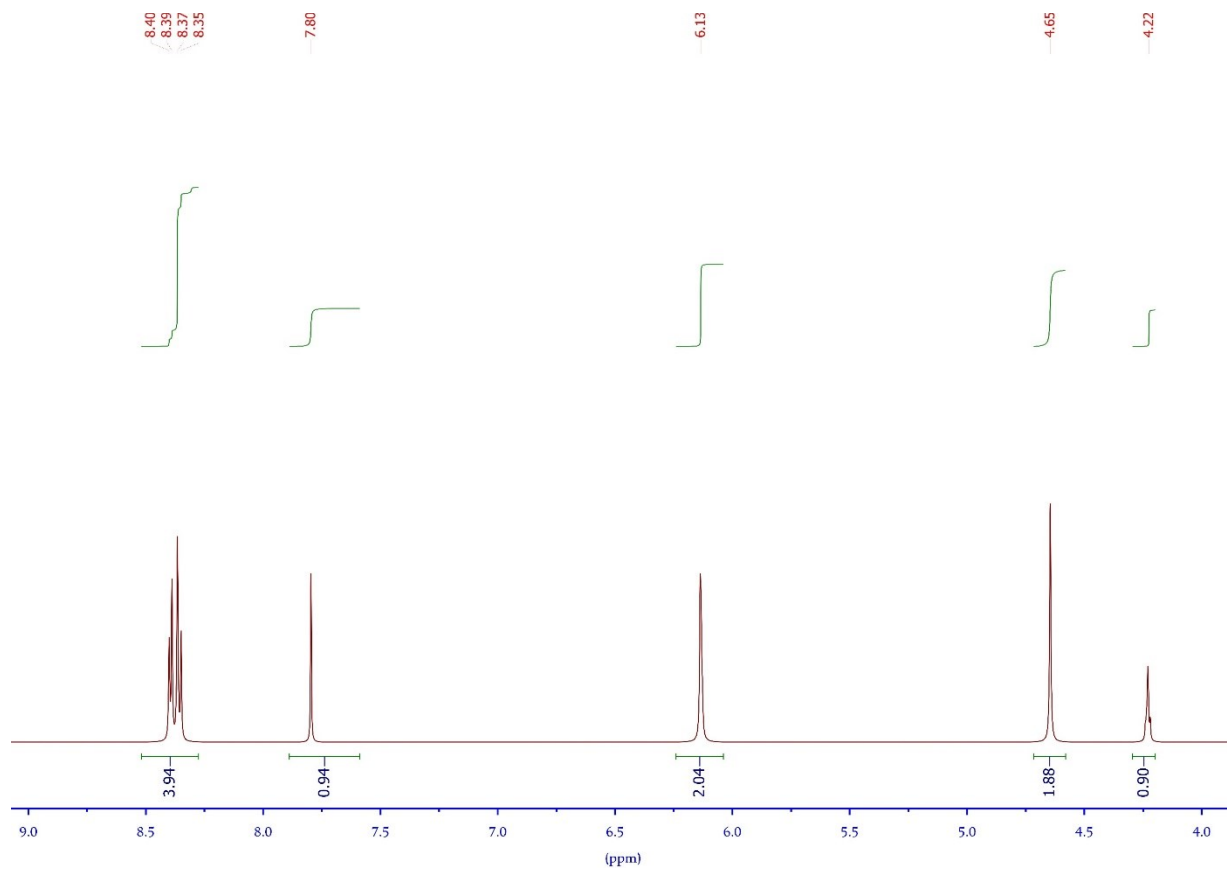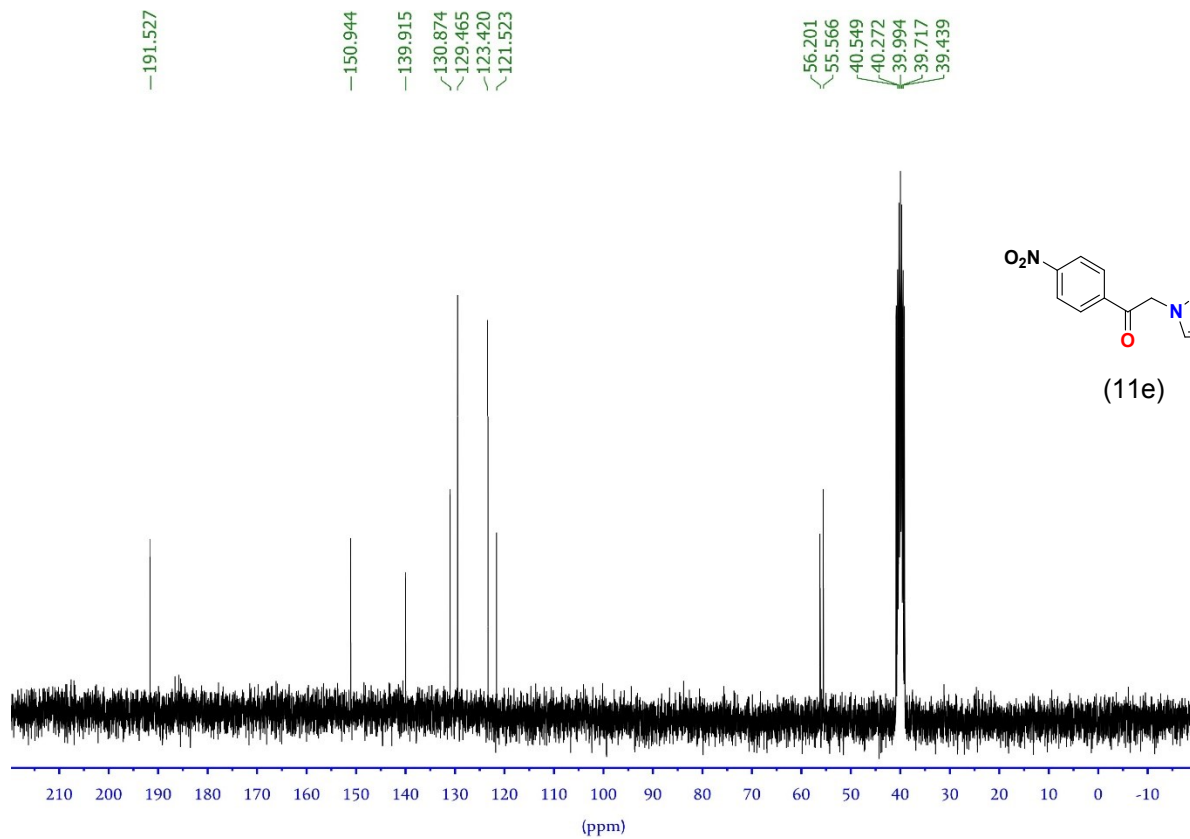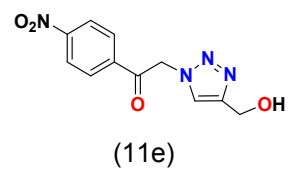

1-(4-bromophenyl)-2-(4-(hydroxymethyl)-1H-1,2,3-triazol-1-yl) ethanone (11f)

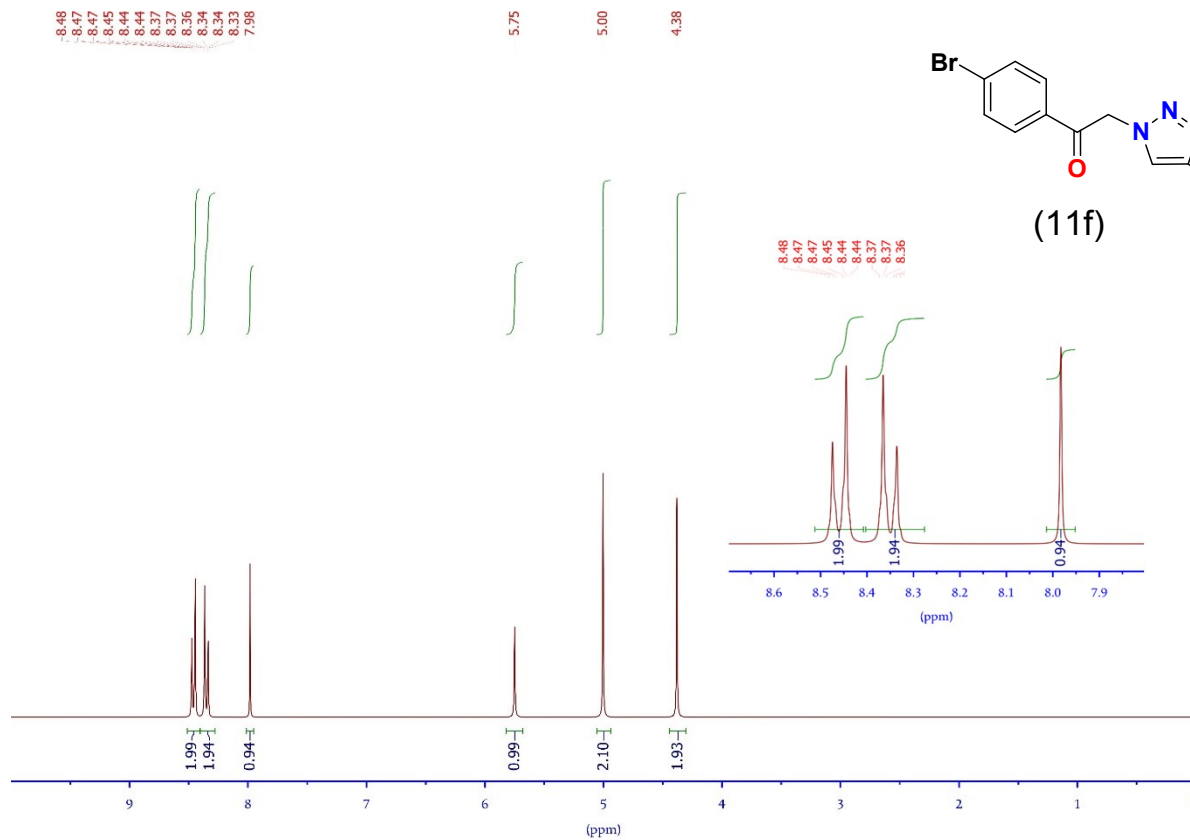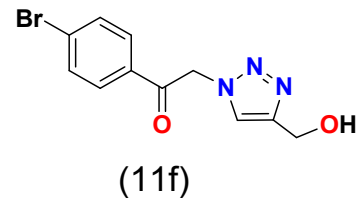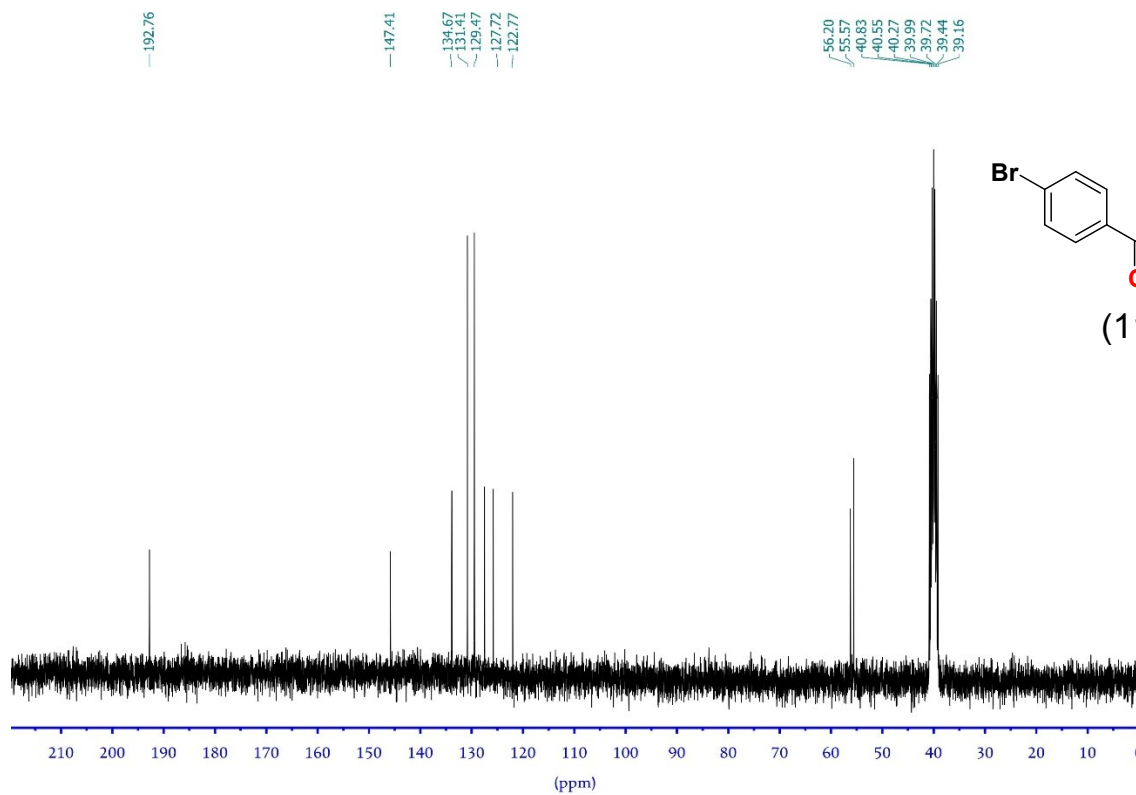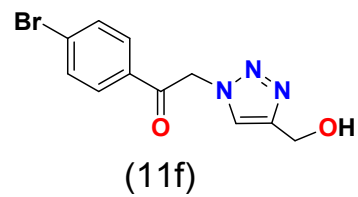

2- (4- (1- hydroxyethyl)- 1H- 1,2,3- triazol- 1- yl)- 1-phenylethanone (11g)

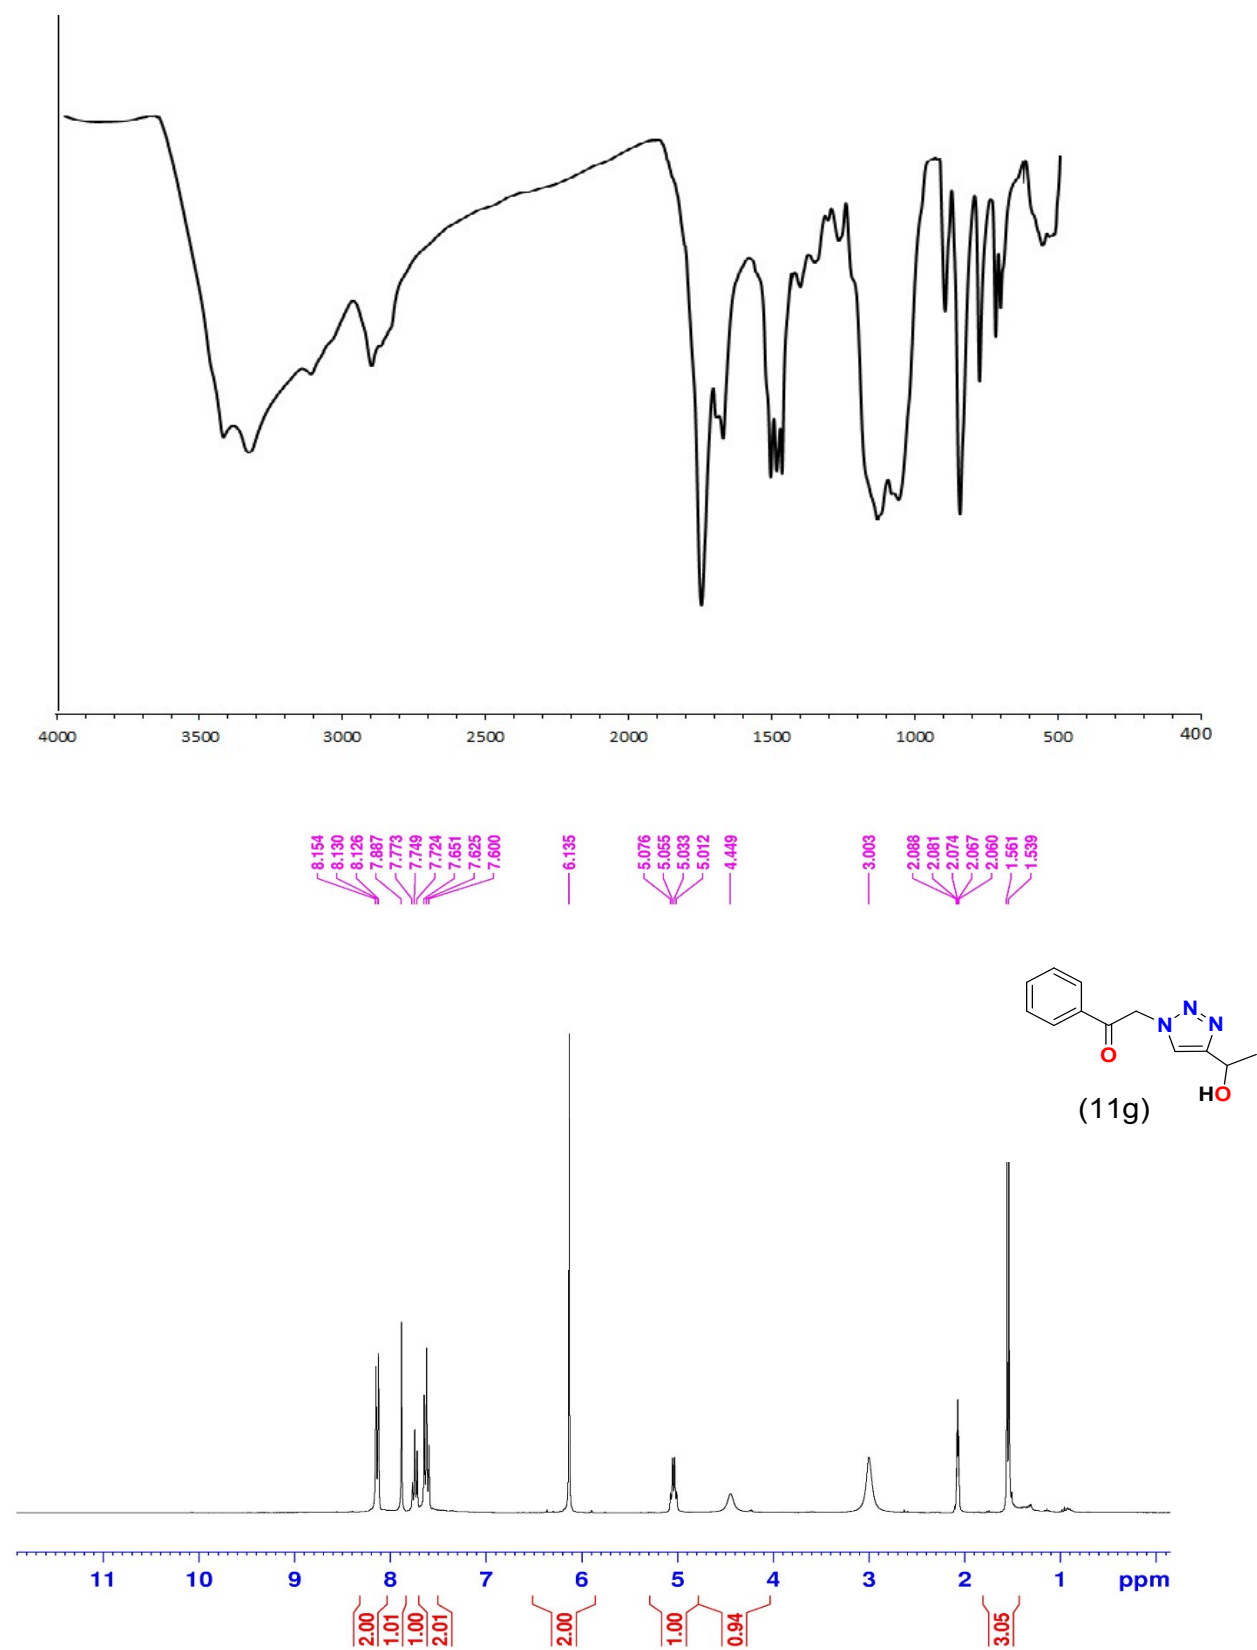

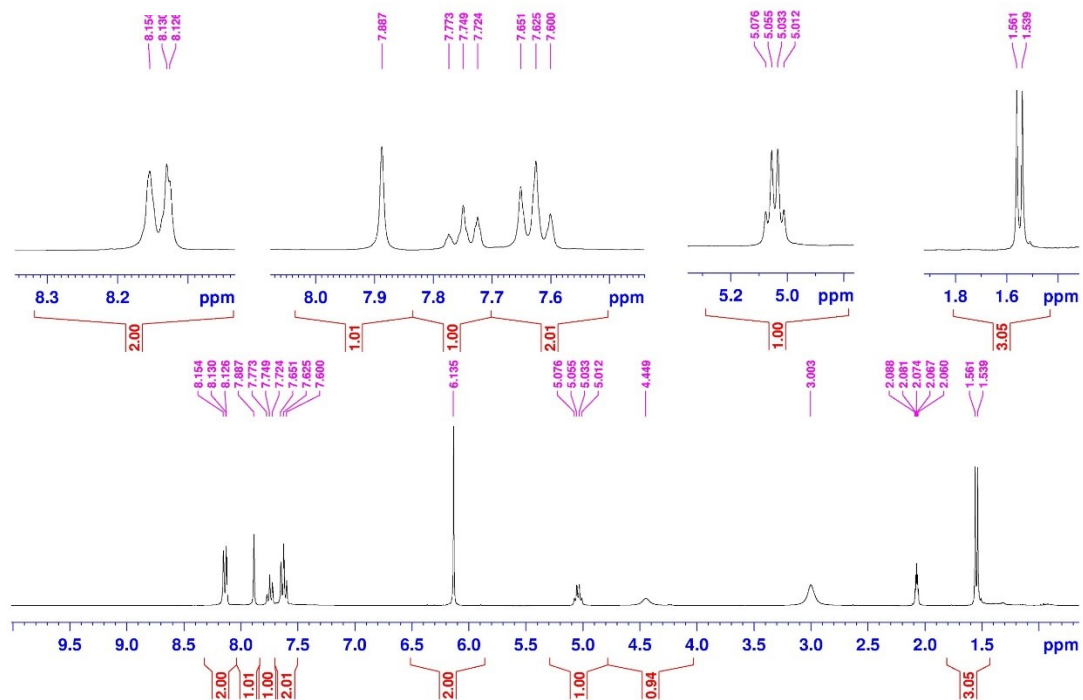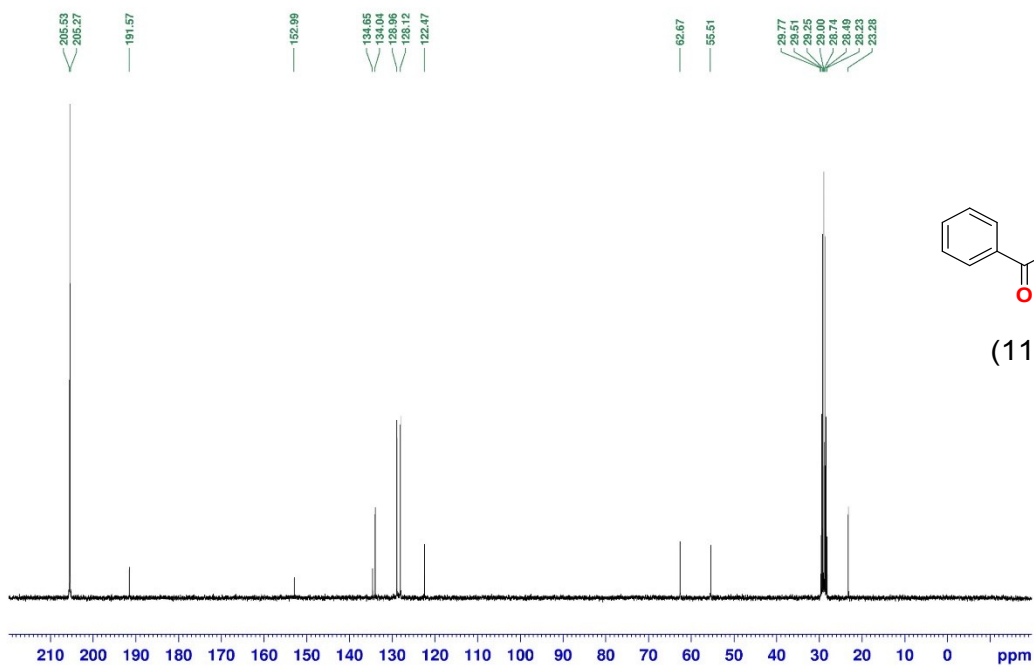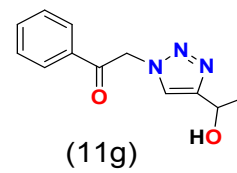



2-(4-(2-hydroxypropan-2-yl)-1H-1,2,3-triazol-1-yl)-1-phenylethanone (11h)

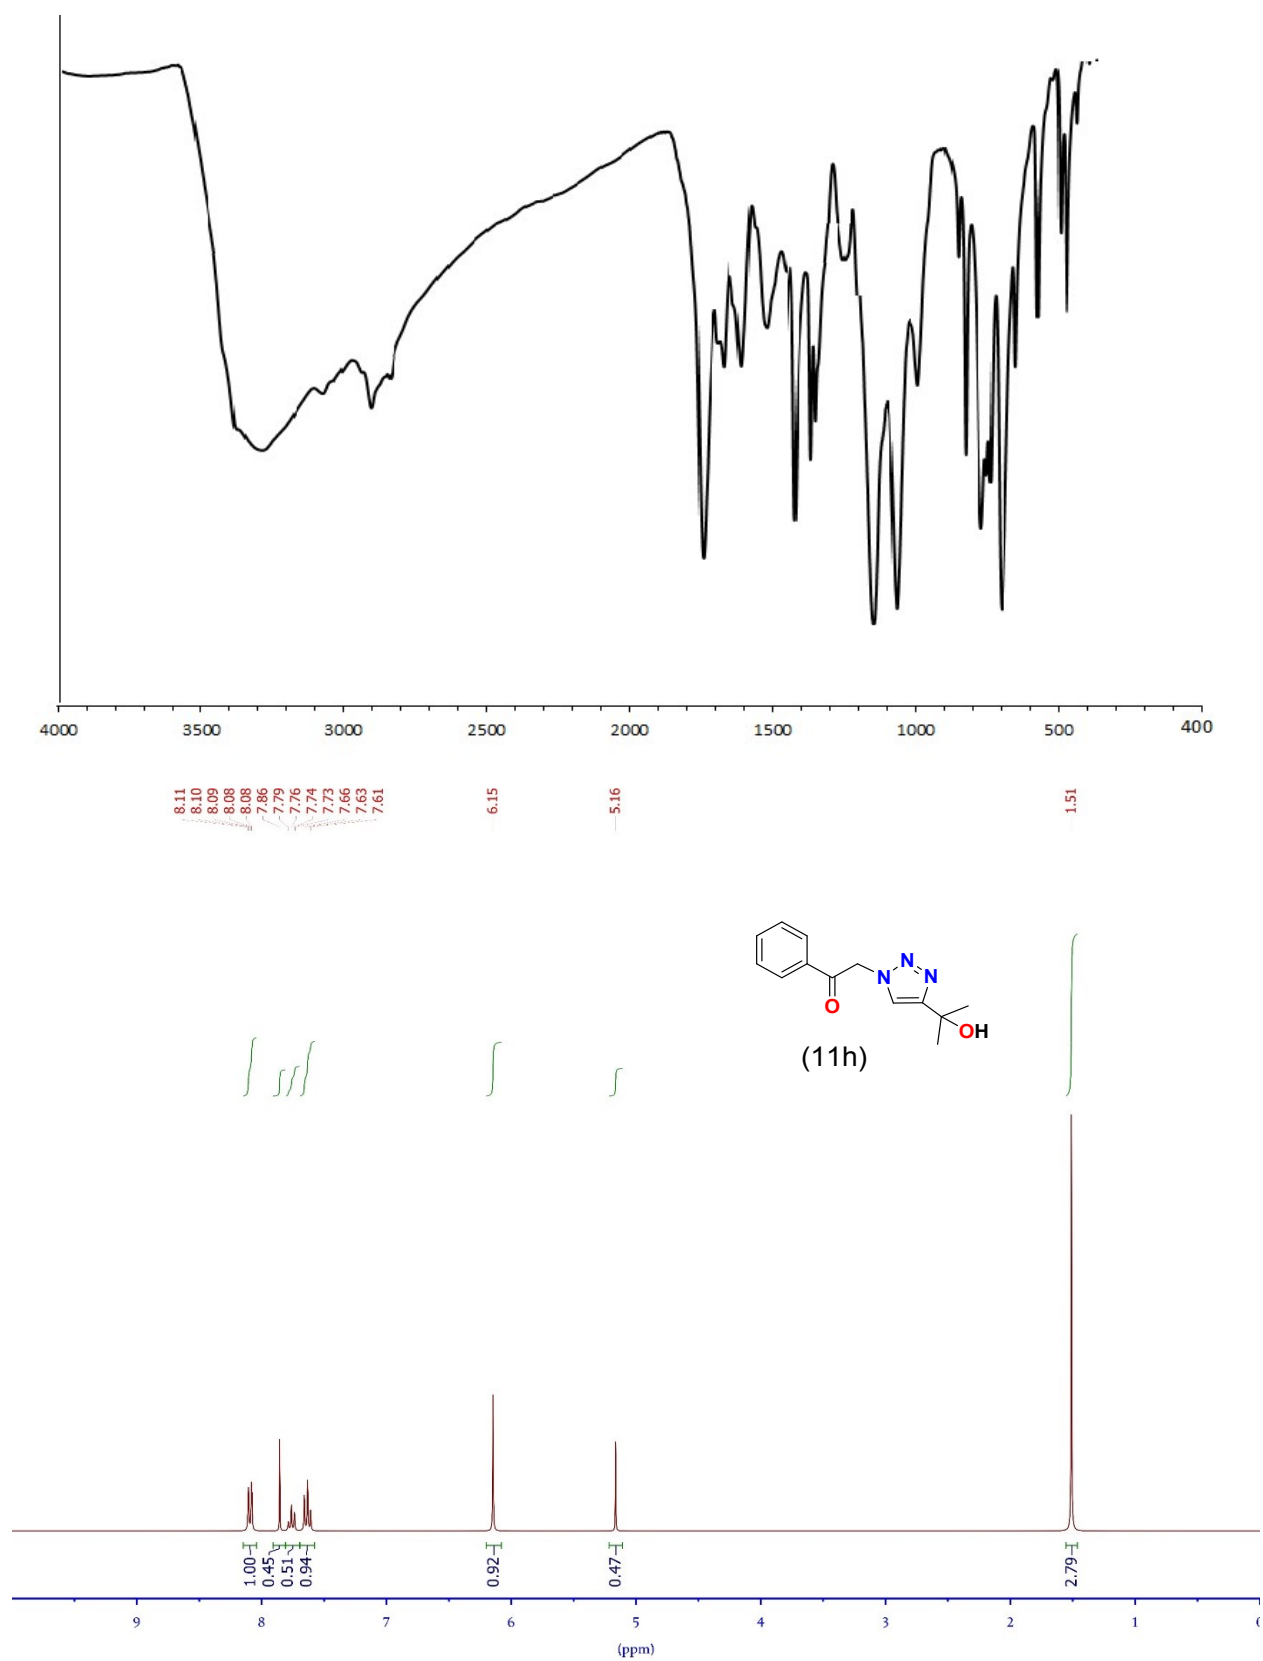

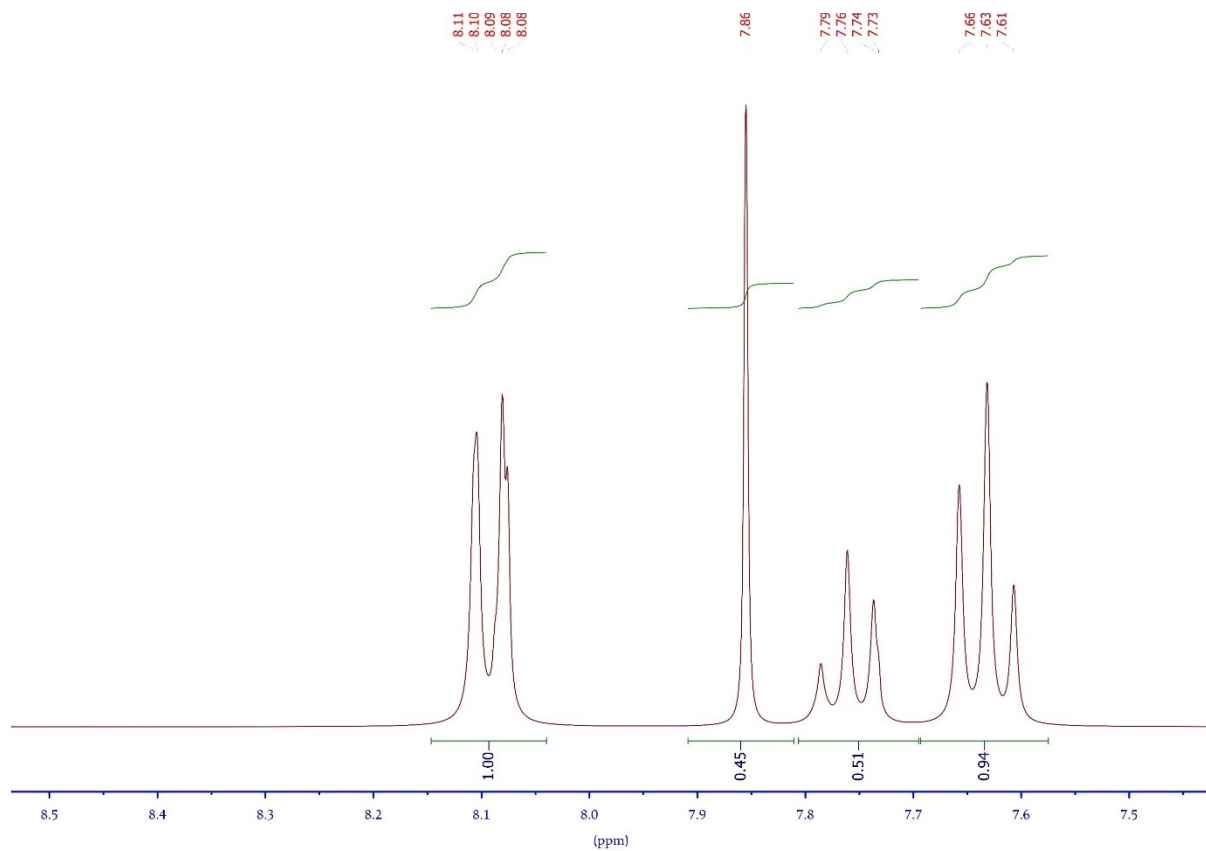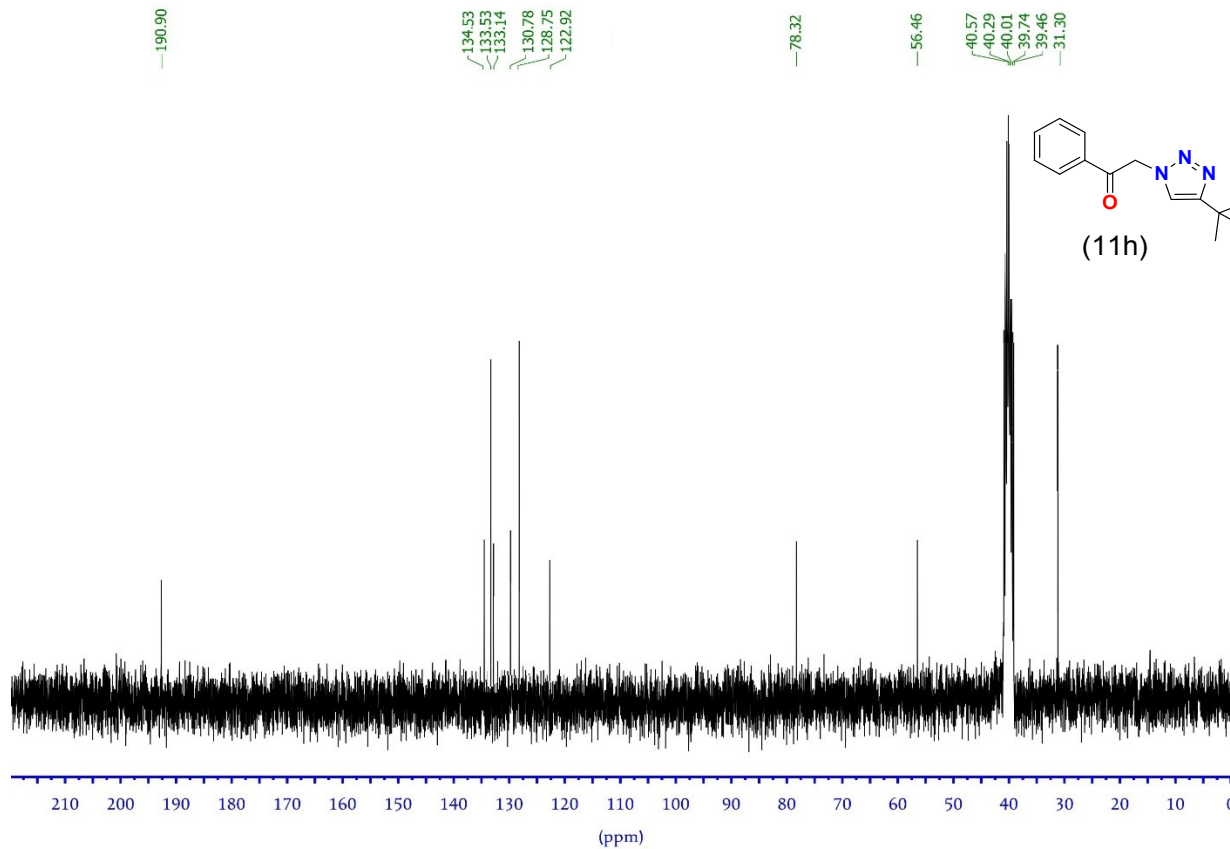

2-(4-(2-hydroxypropan-2-yl)-1H-1,2,3-triazol-1-yl)-1-(4-nitrophenyl) ethanone (11i)

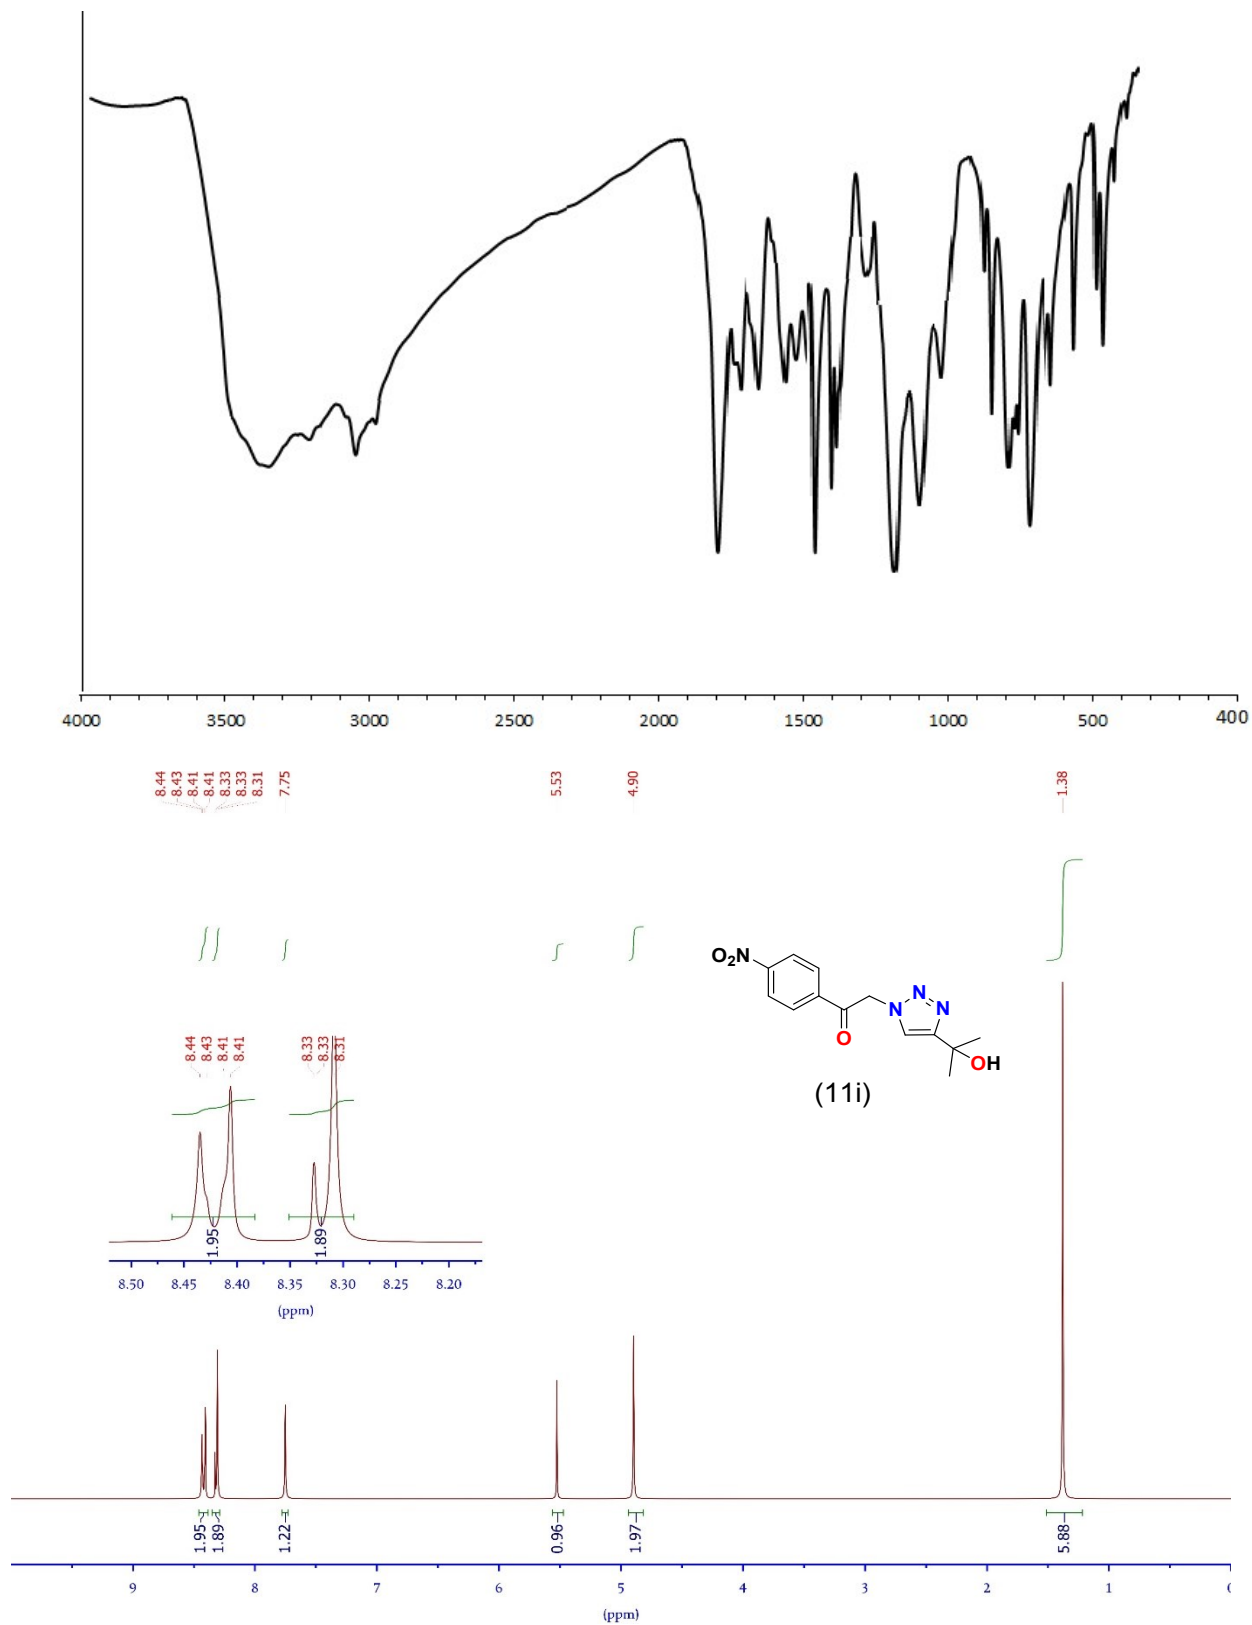

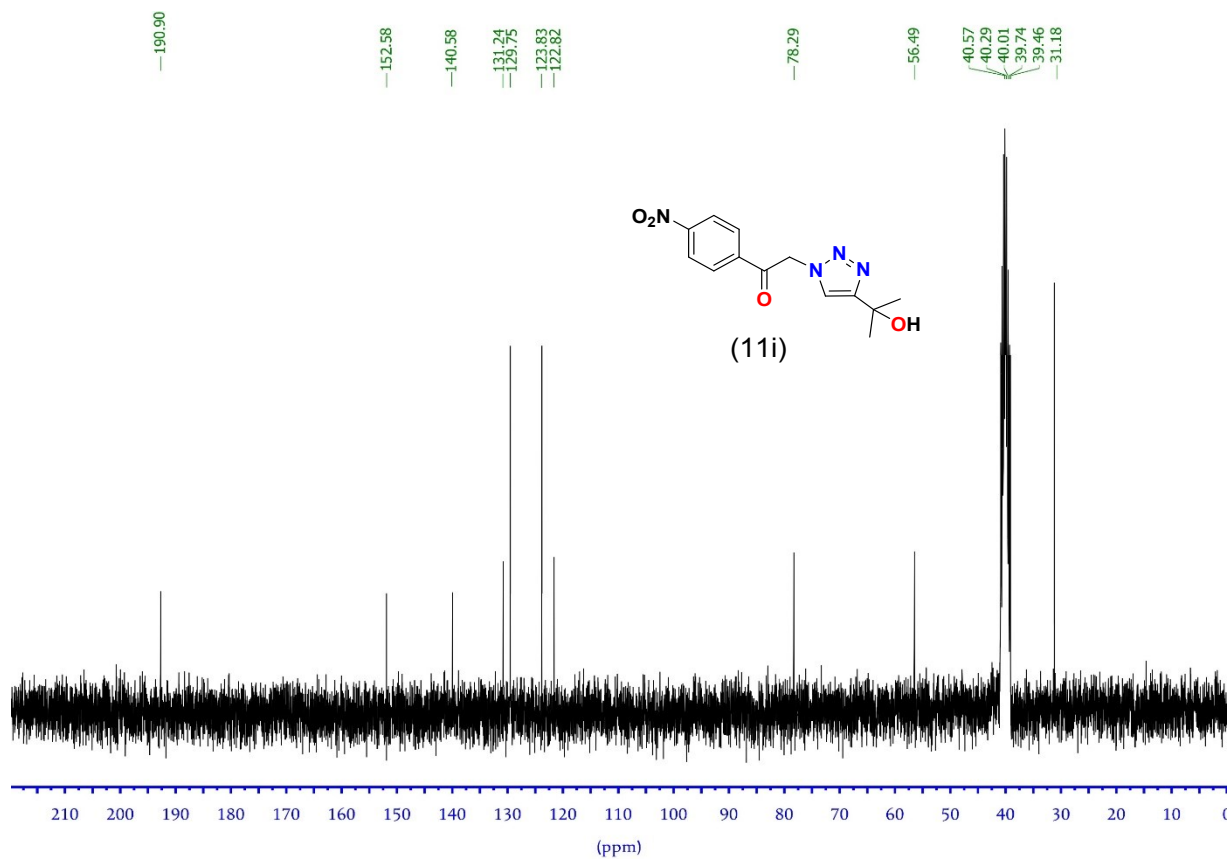

1-(4-bromophenyl)-2-(4-(2-hydroxypropan-2-yl)-1H-1,2,3-triazol-1-yl) ethanone (11j)

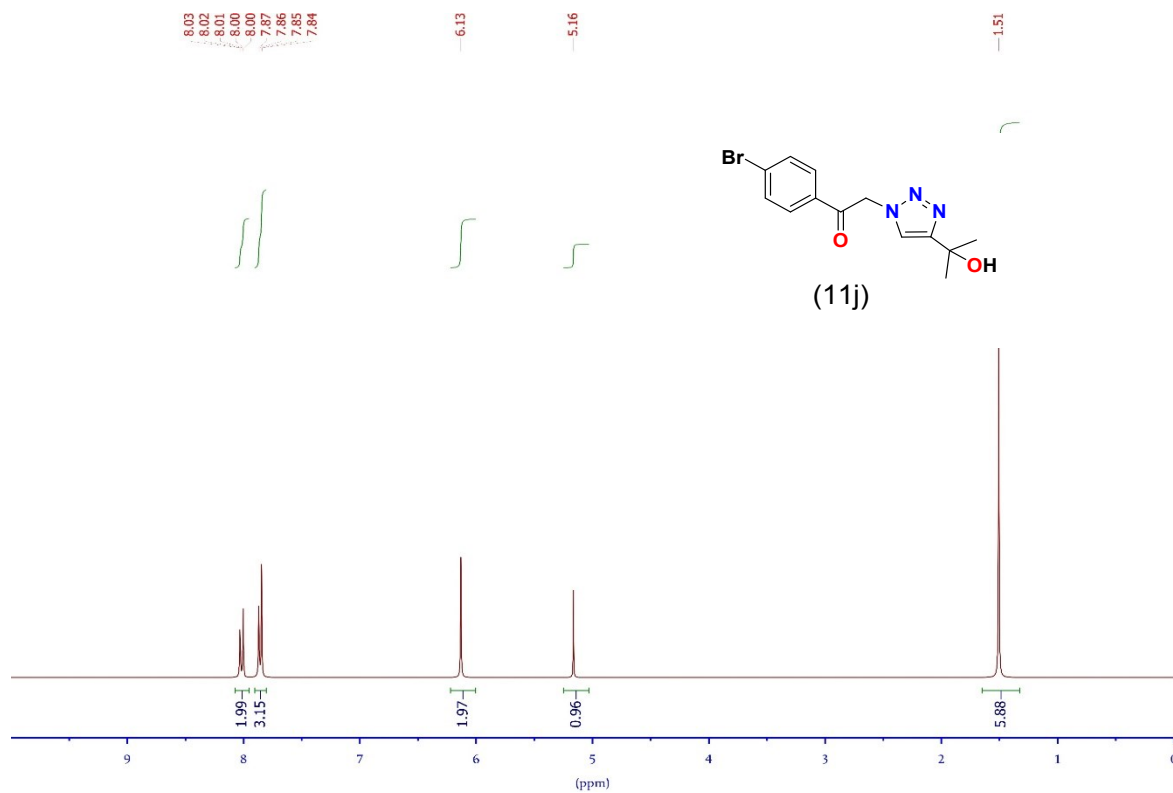

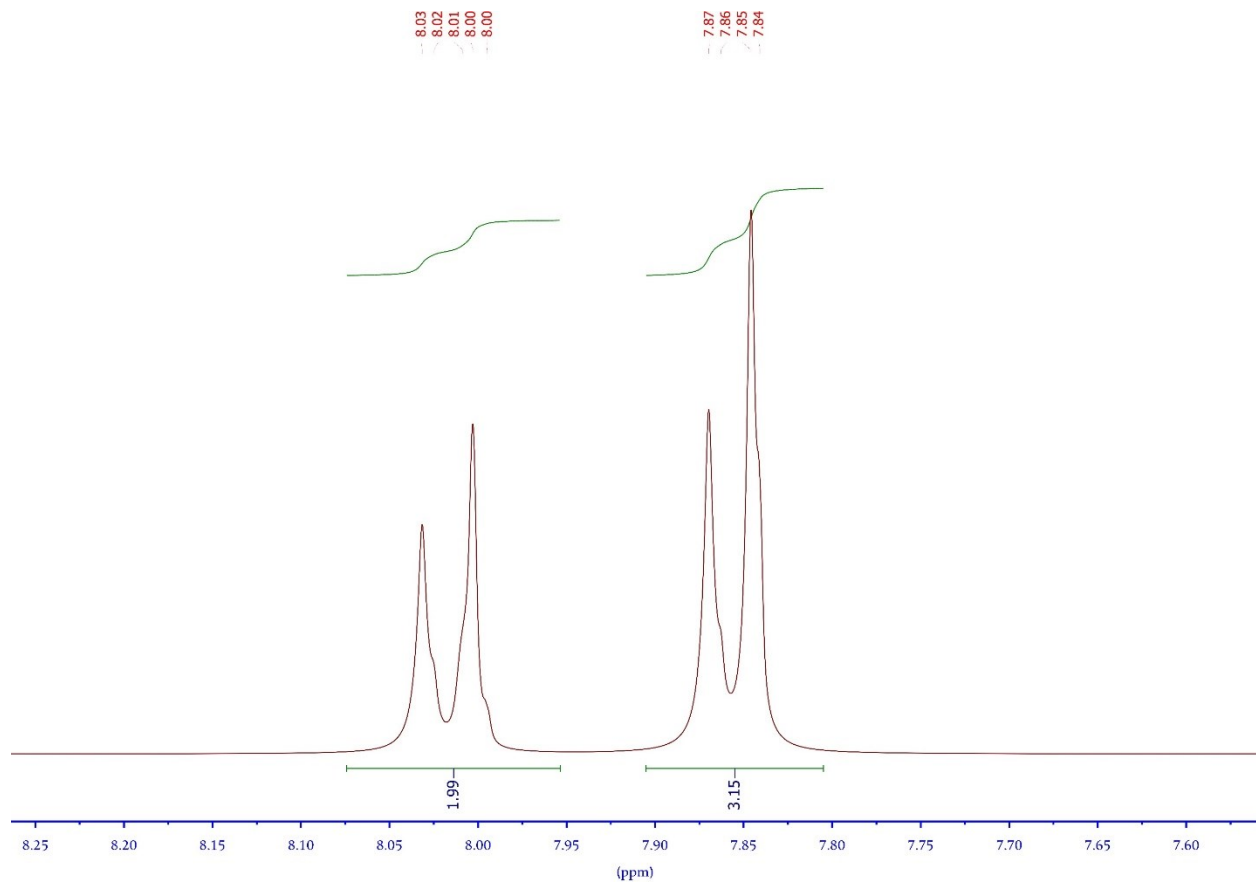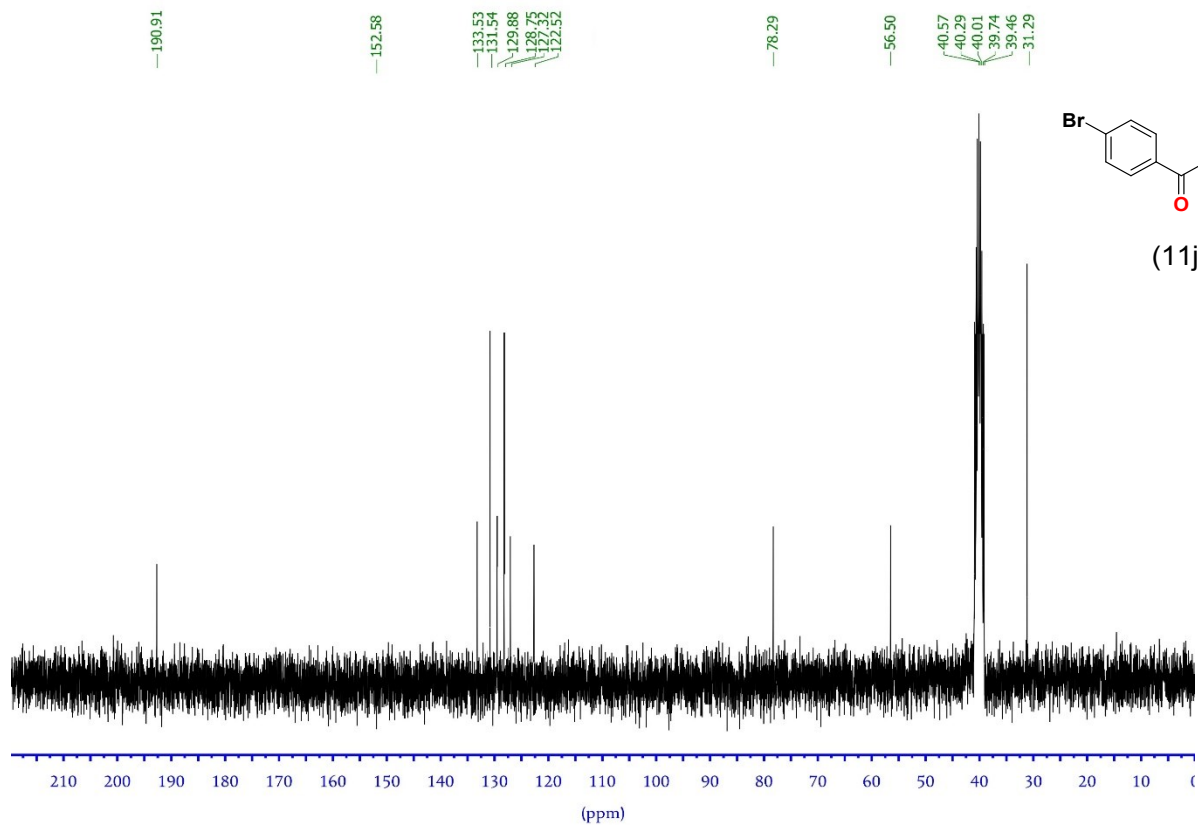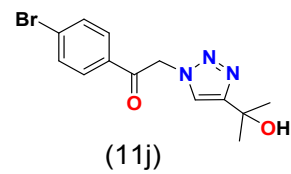

Supplement: RA-010-D0RA06251K-s001.pdf [file RA-010-D0RA06251K-s001.pdf]
